# Supplementary material
Source: PubMed Central journal article supplement (PMC5332302)
Supplement: NIHMS822782-supplement-Supplement.pdf [file NIHMS822782-supplement-Supplement.pdf]

## SUPPLEMENTARY INFORMATION

### Frequent evolution of copy number alterations in CLL following first-line treatment with FC(R) is enriched with *TP53* alterations:

#### Results from the CLL8 trial

Jennifer Edelmann<sup>(1,7)</sup>, Eugen Tausch<sup>(1)</sup>, Dan A. Landau<sup>(2)</sup>, Sandra Robrecht<sup>(3)</sup>, Jasmin Bahlo<sup>(3)</sup>, Kirsten Fischer<sup>(3)</sup>, Anna-Maria Fink<sup>(3)</sup>, Johannes Bloehdorn<sup>(1)</sup>, Karlheinz Holzmann<sup>(4)</sup>, Sebastian Böttcher<sup>(5)</sup>, Lillian Werner<sup>(6)</sup>, Michael Kneba<sup>(5)</sup>, John G. Gribben<sup>(7)</sup>, Donna S. Neuberg<sup>(6)</sup>, Catherine J. Wu<sup>(2)</sup>, Michael Hallek<sup>(3)</sup>, Hartmut Döhner<sup>(1)</sup>, and Stephan Stilgenbauer<sup>(1)</sup>

(1) *Internal Medicine III, Ulm University, Ulm, Germany*

(2) *Department of Medical Oncology, Dana-Farber Cancer Institute, Boston, USA*

(3) *Internal Medicine I, University of Cologne, Cologne, Germany*

(4) *Center for Clinical Research, Genomics Core Facility, Ulm University, Ulm, Germany*

(5) *Second Department of Medicine, University Hospital of Schleswig-Holstein, Campus Kiel, Kiel, Germany*

(6) *Biostatistics and Computational Biology, Dana-Farber Cancer Institute, Boston, USA*

(7) *Barts Cancer Institute, Queen Mary University of London, London, UK*

#### Correspondence:

Jennifer Edelmann (MD), Centre for Haemato-/Oncology, Barts Cancer Institute, Queen Mary University of London, Charterhouse Square, London, EC1M 6BQ, United Kingdom; Phone: +44-20-7882-8780; E-mail: j.edelmann@qmul.ac.uk

Supported by Deutsche Forschungsgemeinschaft (ED 256/1-1, SFB 1074/B2 and Z1), Else Kröner-Fresenius-Stiftung (2012\_A146), Virtual Helmholtz Institute (VH-VI-404, TP2), BMBF (CancerEpiSys, PRECISE), and F. Hoffmann-La Roche (genetic reference diagnostics of CLL8: CD19 enrichment, routine FISH analysis and *IGHV*-status).

## **Supplementary Methods**

The present study included sequential peripheral blood samples from 103 individuals enrolled on the CLL8 trial of the German CLL study group. Written informed consent and local ethics committee approval was obtained in accordance with the Declaration of Helsinki for all patients. Mononuclear cells were isolated by Ficoll density gradient centrifugation. An immuno-magnetic tumor cell enrichment via CD19 (Midi MACS, Miltenyi Biotec®, Bergisch Gladbach, Germany) was performed on all 103 treatment-initiation samples, on 15 of the 86 relapse samples, but not on the pre-treatment samples. In 52 cases the CD19-negative cell fraction contained less than 5% CD19/CD5 co-expressing cells and could therefore be used as intra-individual reference DNA.

Genomic DNA was extracted (Allprep DNA/RNA midi kit; Quiagen®, Hilden) and hybridized to the Genome-Wide Human SNP Array 6.0 according to the manufacturer's protocol (Affymetrix®, Santa Clara, CA, USA). SNP genotype calls were generated by applying the birdseed algorithm in Genotyping Console version 4.0 (Affymetrix®) using at least 50 arrays in each analysis. DNA copy number analyses were performed using reference alignment<sup>[1]</sup>, dChipSNP<sup>[2]</sup> and circular binary segmentation<sup>[3]</sup>.

Segmentation was done pairwise against intra-individual reference DNA in 52 cases having a pure CD19 negative cell-fraction. For the 51 cases lacking matched normal material the segmentation of each sample was computed against a pool of ten gender-matched reference samples. Resulting segments with a window of five consecutive markers and mean log<sub>2</sub>-ratios of > 0.2 and < -0.2 were visually inspected using dChipSNP to exclude inherited copy number variants and false calls due to experimental artifacts (noise or interbatch effects).

Lesions occurring in a subclone with a clone size under 25 % were revised using the aroma.affymetrix software package<sup>[4]</sup> for an exact determination of segment boundaries.

LOH analyses were performed using dChipSNP<sup>[2]</sup>. To determine CN-LOH acquired over time, treatment-initiation samples were computed against their pre-treatment samples and relapse samples were computed against their treatment-initiation sample. According to prior experience, CN-LOH was considered to be a true lesion when containing homozygous SNPs in at least 20 consecutive markers with less than 10 % intervening or conflicting calls<sup>[5]</sup>.

Size position and location of genes were identified with the UCSC Genome Browser; assembly March 2006, NCBI36/hg18 (<http://www.genome.ucsc.edu/>). Microarray raw data were made publicly available at Gene Expression Omnibus (GEO accession number: GSE83566).

All coding exons of *TP53* and *ATM* were screened for mutations by whole exome sequencing (WES) [N=108] or by amplicon based targeted next generation sequencing [N=150; N=42 samples analyzed on both platforms]. Libraries for whole exome sequencing were constructed on an Agilent<sup>®</sup> platform and sequenced on an Illumina<sup>®</sup> HiSeq2000 or HiSeq2500 using 76 bp paired-end reads. For targeted sequencing we used Illumina<sup>®</sup> Design Studio to create custom amplicons with a size of 250 bp covering all coding regions of *TP53* and *ATM*. Library preparation was performed using TruSeq Custom Amplicon Assay Kit v1.5 (Illumina<sup>®</sup>, San Diego, CA,USA) including extension and ligation steps between custom probes and adding of indices. Samples were pooled and loaded on a MiSeq flowcell in 48 sample batches and sequenced with MiSeq Reagent Kit 500v2 (Illumina<sup>®</sup>) for a paired end run. Median depths of WES and targeted sequencing were 96 x and 1332 x, respectively. Different software packages for bioinformatic analyses including

demultiplexing, alignment to hg19 reference genome, variant calling and annotation were used as described elsewhere [6].

### References Supplementary Methods:

- [1] Pounds S, Cheng C, Mullighan C, Raimondi SC, Shurtleff S, Downing JR. Reference alignment of SNP microarray signals for copy number analysis of tumors. *Bioinformatics* 2009; **25**: 315-321.
- [2] Lin M, Wei LJ, Sellers WR, Lieberfarb M, Wong WH, Li C. dChipSNP: significance curve and clustering of SNP-array-based loss-of-heterozygosity data. *Bioinformatics* 2004; **20**: 1233-1240.
- [3] Olshen AB, Venkatraman ES, Lucito R, Wigler M. Circular binary segmentation for the analysis of array-based DNA copy number data. *Biostatistics* 2004; **5**: 557-572.
- [4] Bengtsson H, Irizarry R, Carvalho B, Speed TP. Estimation and assessment of raw copy numbers at the single locus level. *Bioinformatics* 2008; **24**: 759-767.
- [5] Radtke I, Mullighan CG, Ishii M, Su X, Cheng J, Ma J, *et al.* Genomic analysis reveals few genetic alterations in pediatric acute myeloid leukemia. *Proc Natl Acad Sci USA* 2009; **106**: 12944-12949.
- [6] Landau DA, Tausch E, Taylor-Weiner AN, Stewart C, Reiter JG, Bahlo J, *et al.* Mutations driving CLL and their evolution in progression and relapse. *Nature* 2015; **526**: 525-530.

### Supplementary Table S1:

CLL-cases with sequential samples studied by SNP-array based copy-number- and LOH-analysis.

| Sample-ID              | CD19 Enrichment | IGHV      | FISH   |          |     |          |          | TP53 mutation | ATM mutation | Clonal Evolution |      |
|------------------------|-----------------|-----------|--------|----------|-----|----------|----------|---------------|--------------|------------------|------|
|                        |                 |           | normal | del(13q) | +12 | del(11q) | del(17p) |               |              | CNAs             | TP53 |
| CLL001_pre-treatment   | no              | mutated   |        | X        |     |          |          |               |              | no               | no   |
| CLL001_first treatment | yes             |           |        | X        |     |          |          |               |              |                  |      |
| CLL002_pre-treatment   | no              | mutated   |        | X        |     |          |          |               |              | no               | no   |
| CLL002_first treatment | yes             |           |        | X        |     |          |          |               |              |                  |      |
| CLL003_pre-treatment   | no              | unmutated | X      |          |     |          |          |               |              | no               | no   |
| CLL003_first treatment | yes             |           | X      |          |     |          |          |               |              |                  |      |
| CLL004_pre-treatment   | no              | unmutated |        |          | X   |          |          |               |              | no               | no   |
| CLL004_first treatment | yes             |           |        |          | X   |          |          |               |              |                  |      |
| CLL005_pre-treatment   | no              | unmutated |        | X        |     |          |          |               | X            | no               | no   |
| CLL005_first treatment | yes             |           |        | X        |     |          |          |               | X            |                  |      |
| CLL006_pre-treatment   | no              | mutated   |        | X        |     |          |          |               |              | yes              | no   |
| CLL006_first treatment | yes             |           |        | X        |     | X        |          |               |              |                  |      |
| CLL007_pre-treatment   | no              | unmutated |        | X        |     |          |          |               |              | no               | no   |
| CLL007_first treatment | yes             |           |        | X        |     |          |          |               |              |                  |      |
| CLL008_pre-treatment   | no              | mutated   | X      |          |     |          |          |               |              | no               | no   |
| CLL008_first treatment | yes             |           | X      |          |     |          |          |               |              |                  |      |
| CLL009_pre-treatment   | no              | unmutated |        | X        |     | X        |          |               |              | no               | no   |
| CLL009_first treatment | yes             |           |        | X        |     | X        |          |               |              |                  |      |
| CLL010_pre-treatment   | no              | mutated   |        | X        |     |          |          |               |              | no               | no   |
| CLL010_first treatment | yes             |           |        | X        |     |          |          |               |              |                  |      |
| CLL011_pre-treatment   | no              | unmutated |        | X        |     | X        |          |               |              | yes              | no   |
| CLL011_first treatment | yes             |           |        | X        |     | X        |          |               |              |                  |      |

| Sample-ID              | CD19 Enrichment | IGHV      | FISH   |          |     |          |          | TP53 mutation | ATM mutation | Clonal Evolution |      |
|------------------------|-----------------|-----------|--------|----------|-----|----------|----------|---------------|--------------|------------------|------|
|                        |                 |           | normal | del(13q) | +12 | del(11q) | del(17p) |               |              | CNAs             | TP53 |
| CLL012_pre-treatment   | no              | unmutated |        | X        |     |          |          | X             |              | no               | no   |
| CLL012_first treatment | yes             |           |        | X        |     |          |          | X             |              |                  |      |
| CLL013_pre-treatment   | no              | mutated   |        | X        |     |          |          |               | X            | yes              | no   |
| CLL013_first treatment | yes             |           |        | X        |     | X        |          |               | X            |                  |      |
| CLL014_pre-treatment   | no              | mutated   |        | X        |     |          |          |               |              | no               | no   |
| CLL014_first treatment | yes             |           |        | X        |     |          |          |               |              |                  |      |
| CLL015_pre-treatment   | no              | mutated   | X      |          |     |          |          |               |              | no               | no   |
| CLL015_first treatment | yes             |           | X      |          |     |          |          |               |              |                  |      |
| CLL016_pre-treatment   | no              | mutated   |        | X        |     |          |          |               |              | no               | no   |
| CLL016_first treatment | yes             |           |        | X        |     |          |          |               |              |                  |      |
| CLL017_pre-treatment   | no              | unmutated |        | X        |     | X        |          | X             |              | no               | no   |
| CLL017_first treatment | yes             |           |        | X        |     | X        |          | X             |              |                  |      |
| CLL018_pre-treatment   | no              | unmutated |        | X        |     | X        |          |               | X            | no               | no   |
| CLL018_first treatment | yes             |           |        | X        |     | X        |          |               | X            |                  |      |
| CLL018_post treatment  | no              |           |        | X        |     | X        |          |               | X            |                  |      |
| CLL019_pre-treatment   | no              | unmutated | X      |          |     |          |          |               | X            | no               | no   |
| CLL019_first treatment | yes             |           | X      |          |     |          |          |               | X            |                  |      |
| CLL019_post treatment  | no              |           | X      |          |     |          |          |               | X            |                  |      |
| CLL020_pre-treatment   | no              | mutated   |        | X        |     |          |          |               |              | no               | no   |
| CLL020_first treatment | yes             |           |        | X        |     |          |          |               |              |                  |      |
| CLL020_post treatment  | no              |           |        | X        |     |          |          |               |              |                  |      |
| CLL021_pre-treatment   | no              | mutated   |        | X        |     | X        |          |               |              | no               | no   |
| CLL021_first treatment | yes             |           |        | X        |     | X        |          |               |              |                  |      |
| CLL021_post treatment  | no              |           |        | X        |     | X        |          |               |              |                  |      |

| Sample-ID              | CD19 Enrichment | IGHV      | FISH   |          |     |          |          | TP53 mutation | ATM mutation | Clonal Evolution |      |
|------------------------|-----------------|-----------|--------|----------|-----|----------|----------|---------------|--------------|------------------|------|
|                        |                 |           | normal | del(13q) | +12 | del(11q) | del(17p) |               |              | CNAs             | TP53 |
| CLL022_pre-treatment   | no              | unmutated |        |          |     |          | X        | X             |              | no               | no   |
| CLL022_first treatment | yes             |           |        |          |     |          | X        | X             |              |                  |      |
| CLL022_post treatment  | no              |           |        |          |     |          | X        | X             |              |                  |      |
| CLL023_pre-treatment   | no              | unmutated | X      |          |     |          |          | X             |              | no               | no   |
| CLL023_first treatment | yes             |           | X      |          |     |          |          | X             |              |                  |      |
| CLL023_post treatment  | no              |           |        |          |     |          | X        | X             |              |                  |      |
| CLL024_pre-treatment   | no              | unmutated |        | X        |     | X        |          |               |              | no               | no   |
| CLL024_first treatment | yes             |           |        | X        |     | X        |          |               |              |                  |      |
| CLL024_post treatment  | yes             |           |        | X        |     | X        |          |               |              |                  |      |
| CLL025_pre-treatment   | no              | unmutated | X      |          |     |          |          |               |              | yes              | no   |
| CLL025_first treatment | yes             |           |        |          |     | X        |          |               |              |                  |      |
| CLL025_post treatment  | yes             |           |        | X        |     | X        |          |               |              |                  |      |
| CLL026_pre-treatment   | no              | unmutated |        | X        |     | X        |          |               | X            | yes              | no   |
| CLL026_first treatment | yes             |           |        | X        |     | X        |          |               | X            |                  |      |
| CLL026_post treatment  | no              |           |        | X        |     | X        |          |               |              |                  |      |
| CLL027_pre-treatment   | no              | unmutated |        |          |     |          | X        |               |              | no               | no   |
| CLL027_first treatment | yes             |           |        |          |     |          | X        | X             |              |                  |      |
| CLL027_post treatment  | no              |           |        |          |     |          | X        | X             |              |                  |      |
| CLL028_first treatment | yes             | mutated   |        |          |     | X        |          |               | X            | yes              | no   |
| CLL028_post treatment  | no              |           |        | X        |     | X        |          |               | X            |                  |      |
| CLL029_first treatment | yes             | mutated   |        | X        |     |          |          | X             |              | yes              | no   |
| CLL029_post treatment  | no              |           |        | X        |     |          |          | X             |              |                  |      |
| CLL030_first treatment | yes             | mutated   |        | X        |     |          |          | X             |              | yes              | no   |
| CLL030_post treatment  | no              |           |        | X        |     |          | X        | X             |              |                  |      |

| Sample-ID              | CD19 Enrichment | IGHV      | FISH   |          |     |          |          | TP53 mutation | ATM mutation | Clonal Evolution |      |
|------------------------|-----------------|-----------|--------|----------|-----|----------|----------|---------------|--------------|------------------|------|
|                        |                 |           | normal | del(13q) | +12 | del(11q) | del(17p) |               |              | CNAs             | TP53 |
| CLL031_first treatment | yes             | unmutated |        | X        |     |          | X        | X             |              | no               | no   |
| CLL031_post treatment  | yes             |           |        | X        |     |          | X        | X             |              |                  |      |
| CLL032_first treatment | yes             | unmutated |        |          |     | X        |          |               |              | yes              | no   |
| CLL032_post treatment  | no              |           |        | X        |     | X        |          |               |              |                  |      |
| CLL033_first treatment | yes             | unmutated |        |          | X   |          |          |               |              | no               | no   |
| CLL033_post treatment  | no              |           |        |          | X   |          |          |               |              |                  |      |
| CLL034_first treatment | yes             | unmutated | X      |          |     |          |          |               |              | no               | no   |
| CLL034_post treatment  | no              |           |        | X        |     |          |          |               |              |                  |      |
| CLL035_first treatment | yes             | unmutated |        |          |     |          | X        | X             |              | yes              | yes  |
| CLL035_post treatment  | no              |           |        |          |     |          | X        | X             |              |                  |      |
| CLL036_first treatment | yes             | mutated   |        | X        |     |          |          |               |              | no               | no   |
| CLL036_post treatment  | no              |           |        |          | X   |          |          |               |              |                  |      |
| CLL037_first treatment | yes             | unmutated |        |          | X   |          |          |               |              | no               | yes  |
| CLL037_post treatment  | no              |           |        |          | X   |          |          | X             |              |                  |      |
| CLL038_first treatment | yes             | mutated   |        | X        |     |          |          |               |              | no               | no   |
| CLL038_post treatment  | no              |           |        |          | X   |          |          |               |              |                  |      |
| CLL039_first treatment | yes             | mutated   |        | X        |     |          |          |               |              | yes              | no   |
| CLL039_post treatment  | no              |           |        |          | X   |          | X        |               | X            |                  |      |
| CLL040_first treatment | yes             | unmutated |        | X        |     | X        | X        |               |              | yes              | no   |
| CLL040_post treatment  | no              |           |        |          | X   |          | X        | X             |              |                  |      |
| CLL041_first treatment | yes             | unmutated |        | X        |     |          |          |               |              | no               | no   |
| CLL041_post treatment  | no              |           |        |          | X   |          |          |               |              |                  |      |
| CLL042_first treatment | yes             | unmutated |        | X        |     |          |          |               |              | yes              | yes  |
| CLL042_post treatment  | no              |           |        |          | X   |          |          | X             |              |                  |      |



| Sample-ID              | CD19 Enrichment | IGHV      | FISH   |          |     |          |          | TP53 mutation | ATM mutation | Clonal Evolution |      |
|------------------------|-----------------|-----------|--------|----------|-----|----------|----------|---------------|--------------|------------------|------|
|                        |                 |           | normal | del(13q) | +12 | del(11q) | del(17p) |               |              | CNAs             | TP53 |
| CLL043_first treatment | yes             | unmutated | X      |          |     |          |          |               |              | yes              | no   |
| CLL043_post treatment  | no              |           |        | X        |     |          |          |               |              |                  |      |
| CLL044_first treatment | yes             | unmutated |        | X        |     | X        |          |               |              | yes              | no   |
| CLL044_post treatment  | no              |           |        | X        |     | X        | X        |               |              |                  |      |
| CLL045_first treatment | yes             | unmutated | X      |          |     |          |          | X             |              | no               | no   |
| CLL045_post treatment  | no              |           |        | X        |     |          |          | X             |              |                  |      |
| CLL046_first treatment | yes             | unmutated | X      |          |     |          |          |               |              | no               | no   |
| CLL046_post treatment  | no              |           |        | X        |     |          |          |               |              |                  |      |
| CLL047_first treatment | yes             | unmutated |        |          |     | X        |          |               |              | yes              | no   |
| CLL047_post treatment  | no              |           |        | X        |     |          |          |               |              |                  |      |
| CLL048_first treatment | yes             | unmutated |        | X        |     |          |          |               |              | yes              | no   |
| CLL048_post treatment  | no              |           |        |          | X   |          | X        |               |              |                  |      |
| CLL049_first treatment | yes             | unmutated |        | X        |     | X        |          |               |              | no               | yes  |
| CLL049_post treatment  | no              |           |        |          | X   |          | X        | X             |              |                  |      |
| CLL050_first treatment | yes             | unmutated |        | X        |     | X        |          |               |              | no               | no   |
| CLL050_post treatment  | yes             |           |        |          | X   |          | X        |               |              |                  |      |
| CLL051_first treatment | yes             | unmutated | X      |          |     |          |          |               |              | no               | no   |
| CLL051_post treatment  | no              |           |        | X        |     |          |          |               |              |                  |      |
| CLL052_first treatment | yes             | mutated   | X      |          |     |          |          |               |              | no               | no   |
| CLL052_post treatment  | no              |           |        | X        |     |          |          |               |              |                  |      |
| CLL053_first treatment | yes             | unmutated |        | X        |     |          |          |               |              | no               | yes  |
| CLL053_post treatment  | no              |           |        |          | X   |          |          | X             |              |                  |      |
| CLL054_first treatment | yes             | unmutated |        | X        |     | X        |          |               | X            | yes              | yes  |
| CLL054_post treatment  | yes             |           |        |          |     |          | X        | X             | X            |                  |      |

| Sample-ID              | CD19 Enrichment | IGHV      | FISH   |          |     |          |          | TP53 mutation | ATM mutation | Clonal Evolution |      |
|------------------------|-----------------|-----------|--------|----------|-----|----------|----------|---------------|--------------|------------------|------|
|                        |                 |           | normal | del(13q) | +12 | del(11q) | del(17p) |               |              | CNAs             | TP53 |
| CLL055_first treatment | yes             | unmutated |        | X        |     | X        |          |               | no           | no               |      |
| CLL055_post treatment  | no              |           |        | X        |     | X        |          | X             |              |                  |      |
| CLL056_first treatment | yes             | unmutated |        | X        |     | X        |          |               | no           | no               |      |
| CLL056_post treatment  | no              |           |        | X        |     | X        |          |               |              |                  |      |
| CLL057_first treatment | yes             | unmutated |        | X        |     | X        |          |               | no           | no               |      |
| CLL057_post treatment  | no              |           |        | X        |     | X        |          |               |              |                  |      |
| CLL058_first treatment | yes             | unmutated |        |          |     | X        |          | X             | no           | no               |      |
| CLL058_post treatment  | no              |           |        |          |     | X        |          | X             |              |                  |      |
| CLL059_first treatment | yes             | unmutated |        |          |     | X        |          | X             | no           | no               |      |
| CLL059_post treatment  | no              |           |        |          |     | X        |          | X             |              |                  |      |
| CLL060_first treatment | yes             | unmutated | X      |          |     |          |          |               | no           | yes              |      |
| CLL060_post treatment  | no              |           | X      |          |     |          | X        | X             |              |                  |      |
| CLL061_first treatment | yes             | unmutated | X      |          |     |          |          |               | yes          | no               |      |
| CLL061_post treatment  | no              |           | X      |          |     |          |          |               |              |                  |      |
| CLL062_first treatment | yes             | mutated   |        |          | X   |          |          |               | no           | no               |      |
| CLL062_post treatment  | yes             |           |        |          | X   |          |          |               |              |                  |      |
| CLL063_first treatment | yes             | unmutated |        |          | X   |          |          |               | yes          | yes              |      |
| CLL063_post treatment  | no              |           |        |          | X   |          | X        | X             |              |                  |      |
| CLL064_first treatment | yes             | unmutated |        | X        |     |          |          | X             | no           | no               |      |
| CLL064_post treatment  | no              |           |        | X        |     |          |          | X             |              |                  |      |
| CLL065_first treatment | yes             | mutated   | X      |          |     |          |          |               | no           | no               |      |
| CLL065_post treatment  | yes             |           | X      |          |     |          |          |               |              |                  |      |
| CLL066_first treatment | yes             | unmutated |        | X        |     |          |          |               | no           | no               |      |
| CLL066_post treatment  | no              |           |        | X        |     |          |          |               |              |                  |      |

| Sample-ID              | CD19 Enrichment | IGHV      | FISH   |          |     |          |          | TP53 mutation | ATM mutation | Clonal Evolution |      |
|------------------------|-----------------|-----------|--------|----------|-----|----------|----------|---------------|--------------|------------------|------|
|                        |                 |           | normal | del(13q) | +12 | del(11q) | del(17p) |               |              | CNAs             | TP53 |
| CLL067_first treatment | yes             | mutated   |        | X        |     | X        |          |               |              | yes              | no   |
| CLL067_post treatment  | no              |           |        | X        |     | X        |          |               |              |                  |      |
| CLL068_first treatment | yes             | unmutated |        | X        |     | X        |          |               |              | yes              | yes  |
| CLL068_post treatment  | no              |           |        | X        |     | X        | X        | X             |              |                  |      |
| CLL069_first treatment | yes             | mutated   |        | X        |     | X        |          |               |              | no               | no   |
| CLL069_post treatment  | no              |           |        | X        |     | X        |          |               |              |                  |      |
| CLL070_first treatment | yes             | unmutated |        | X        |     |          |          |               |              | yes              | yes  |
| CLL070_post treatment  | no              |           |        | X        |     |          | X        | X             |              |                  |      |
| CLL071_first treatment | yes             | unmutated |        | X        |     |          |          | X             |              | no               | no   |
| CLL071_post treatment  | yes             |           |        | X        |     |          |          | X             |              |                  |      |
| CLL072_first treatment | yes             | unknown   |        | X        |     |          |          |               |              | no               | no   |
| CLL072_post treatment  | yes             |           |        | X        |     |          |          |               |              |                  |      |
| CLL073_first treatment | yes             | unmutated |        | X        |     | X        |          |               |              | yes              | yes  |
| CLL073_post treatment  | yes             |           |        | X        |     | X        | X        | X             |              |                  |      |
| CLL074_first treatment | yes             | unmutated |        | X        |     |          | X        | X             |              | no               | no   |
| CLL074_post treatment  | no              |           |        | X        |     |          | X        | X             |              |                  |      |
| CLL075_first treatment | yes             | unmutated |        | X        |     | X        |          |               | X            | no               | no   |
| CLL075_post treatment  | no              |           |        | X        |     | X        |          |               | X            |                  |      |
| CLL076_first treatment | yes             | unmutated | X      |          |     |          |          |               |              | no               | yes  |
| CLL076_post treatment  | yes             |           |        | X        |     |          |          | X             |              |                  |      |
| CLL077_first treatment | yes             | mutated   |        | X        |     |          |          | X             |              | no               | no   |
| CLL077_post treatment  | yes             |           |        |          | X   |          |          | X             |              |                  |      |
| CLL078_first treatment | yes             | unmutated | X      |          |     |          |          |               |              | yes              | no   |
| CLL078_post treatment  | no              |           |        |          | X   |          |          |               |              |                  |      |

| Sample-ID              | CD19 Enrichment | IGHV      | FISH   |          |     |          |          | TP53 mutation | ATM mutation | Clonal Evolution |      |
|------------------------|-----------------|-----------|--------|----------|-----|----------|----------|---------------|--------------|------------------|------|
|                        |                 |           | normal | del(13q) | +12 | del(11q) | del(17p) |               |              | CNAs             | TP53 |
| CLL079_first treatment | yes             | unmutated |        | X        |     |          |          |               |              | no               | no   |
| CLL079_post treatment  | yes             |           |        | X        |     |          |          |               |              |                  |      |
| CLL080_first treatment | yes             | unmutated |        | X        |     |          |          |               |              | no               | no   |
| CLL080_post treatment  | no              |           |        | X        |     |          |          |               |              |                  |      |
| CLL081_first treatment | yes             | unmutated |        |          |     | X        |          |               |              | no               | no   |
| CLL081_post treatment  | yes             |           |        |          |     | X        |          |               |              |                  |      |
| CLL082_first treatment | yes             | unmutated |        |          |     |          | X        | X             |              | no               | no   |
| CLL082_post treatment  | no              |           |        |          |     |          | X        | X             |              |                  |      |
| CLL083_first treatment | yes             | unmutated |        |          | X   |          |          |               |              | no               | no   |
| CLL083_post treatment  | no              |           |        |          | X   |          |          |               |              |                  |      |
| CLL084_first treatment | yes             | unmutated |        | X        |     |          |          |               |              | yes              | no   |
| CLL084_post treatment  | no              |           |        | X        |     |          |          |               |              |                  |      |
| CLL085_first treatment | yes             | unmutated |        |          |     | X        |          |               |              | no               | no   |
| CLL085_post treatment  | no              |           |        |          |     | X        |          |               |              |                  |      |
| CLL086_first treatment | yes             | unmutated | X      |          |     |          |          |               |              | no               | no   |
| CLL086_post treatment  | no              |           | X      |          |     |          |          |               |              |                  |      |
| CLL087_first treatment | yes             | unmutated |        | X        |     | X        |          |               |              | no               | no   |
| CLL087_post treatment  | yes             |           |        | X        |     | X        |          |               |              |                  |      |
| CLL088_first treatment | yes             | unmutated | X      |          |     |          |          |               |              | yes              | no   |
| CLL088_post treatment  | no              |           | X      |          |     |          |          |               |              |                  |      |
| CLL089_first treatment | yes             | unmutated |        | X        |     | X        |          |               | X            | yes              | no   |
| CLL089_post treatment  | no              |           |        | X        |     | X        |          |               | X            |                  |      |
| CLL090_first treatment | yes             | unmutated |        | X        |     | X        |          |               | X            | no               | no   |
| CLL090_post treatment  | no              |           |        | X        |     | X        |          |               | X            |                  |      |

| Sample-ID              | CD19 Enrichment | IGHV      | FISH   |          |     |          |          | TP53 mutation | ATM mutation | Clonal Evolution |      |
|------------------------|-----------------|-----------|--------|----------|-----|----------|----------|---------------|--------------|------------------|------|
|                        |                 |           | normal | del(13q) | +12 | del(11q) | del(17p) |               |              | CNAs             | TP53 |
| CLL091_first treatment | yes             | mutated   | X      |          |     |          |          |               |              | no               | no   |
| CLL091_post treatment  | no              |           | X      |          |     |          |          |               |              |                  |      |
| CLL092_first treatment | yes             | mutated   |        | X        |     |          |          |               |              | no               | no   |
| CLL092_post treatment  | no              |           |        | X        |     |          |          |               |              |                  |      |
| CLL093_first treatment | yes             | mutated   | X      |          |     |          |          |               |              | yes              | yes  |
| CLL093_post treatment  | no              |           |        |          |     |          | X        | X             |              |                  |      |
| CLL094_first treatment | yes             | unknown   |        |          | X   |          |          |               |              | no               | no   |
| CLL094_post treatment  | no              |           |        |          | X   |          |          |               |              |                  |      |
| CLL095_first treatment | yes             | mutated   |        | X        |     | X        |          |               |              | no               | no   |
| CLL095_post treatment  | no              |           |        | X        |     | X        |          |               |              |                  |      |
| CLL096_first treatment | yes             | mutated   |        | X        |     |          |          |               |              | yes              | no   |
| CLL096_post treatment  | no              |           |        | X        |     |          |          | X             |              |                  |      |
| CLL097_first treatment | yes             | unmutated |        | X        |     | X        |          |               |              | no               | no   |
| CLL097_post treatment  | no              |           |        | X        |     | X        |          |               |              |                  |      |
| CLL098_first treatment | yes             | unmutated |        | X        |     | X        |          |               |              | no               | no   |
| CLL098_post treatment  | no              |           |        | X        |     | X        |          |               |              |                  |      |
| CLL099_first treatment | yes             | mutated   |        | X        |     | X        |          |               | X            | yes              | no   |
| CLL099_post treatment  | no              |           |        | X        |     | X        |          |               | X            |                  |      |
| CLL100_first treatment | yes             | unmutated | X      |          |     |          |          |               |              | yes              | yes  |
| CLL100_post treatment  | no              |           |        |          |     |          | X        | X             |              |                  |      |
| CLL101_first treatment | yes             | unmutated |        |          | X   |          |          |               |              | yes              | no   |
| CLL101_post treatment  | no              |           |        |          | X   |          |          |               |              |                  |      |
| CLL102_first treatment | yes             | unmutated |        | X        |     | X        |          |               | X            | yes              | no   |
| CLL102_post treatment  | no              |           |        | X        |     | X        |          |               | X            |                  |      |

| Sample-ID              | CD19 Enrichment | IGHV    | FISH   |          |     |          |          | TP53 mutation | ATM mutation | Clonal Evolution |      |
|------------------------|-----------------|---------|--------|----------|-----|----------|----------|---------------|--------------|------------------|------|
|                        |                 |         | normal | del(13q) | +12 | del(11q) | del(17p) |               |              | CNAs             | TP53 |
| CLL103_first treatment | yes             | mutated | X      |          |     |          |          |               |              | no               | yes  |
| CLL103_post treatment  | no              |         | X      |          |     |          |          | X             |              |                  |      |

## Supplementary Table S2:

Observed copy number alterations (CNAs) for each case within the sequential samples of 103 analyzed cases. CNAs are listed for each case by providing start and stop positions referring to the UCSC Genome Browser; assembly March 2006, NCBI36/hg18 (<http://www.genome.ucsc.edu/>) and providing the mean log2 ratio over each segment.

| ID                     | Chr. | Cytoband      | Segment Start [bp] | Segment Stop [bp] | Segment Length [bp] | Type of CNA | Mean Log2 Ratio |
|------------------------|------|---------------|--------------------|-------------------|---------------------|-------------|-----------------|
| CLL001_pre-treatment   | 13   | q14.2-q14.3   | 47,660,311         | 50,063,894        | 2,403,583           | loss        | -0.912          |
| CLL001_first treatment | 13   | q14.2-q14.3   | 47,660,311         | 50,063,894        | 2,403,583           | loss        | -0.963          |
| CLL002_pre-treatment   | 13   | q14.3         | 49,142,151         | 50,470,735        | 1,328,584           | loss        | -0.617          |
| CLL002_first treatment | 13   | q14.3         | 49,142,151         | 50,470,735        | 1,328,584           | loss        | -1.251          |
| CLL003_pre-treatment   | /    |               |                    |                   |                     |             |                 |
| CLL003_first treatment | /    |               |                    |                   |                     |             |                 |
| CLL004_pre-treatment   | 12   | pter-qter     | 20,691             | 132,288,250       | 132,267,559         | gain        | 0.449           |
| CLL004_first treatment | 12   | pter-qter     | 20,691             | 132,288,250       | 132,267,559         | gain        | 0.674           |
| CLL005_pre-treatment   | 1    | q43           | 237,921,600        | 238,350,737       | 429,137             | loss        | -0.837          |
|                        | 2    | pter-p11.1    | 2,772              | 91,669,524        | 91,666,752          | gain        | 0.394           |
|                        | 13   | q14.2-q14.3   | 48,298,134         | 50,803,969        | 2,505,835           | loss        | -1.199          |
|                        | 18   | pter-p11.21   | 1,543              | 15,349,282        | 15,347,739          | loss        | -0.473          |
| CLL005_first treatment | 1    | q43           | 237,921,600        | 238,350,737       | 429,137             | loss        | -0.986          |
|                        | 2    | pter-p11.1    | 2,772              | 91,669,524        | 91,666,752          | gain        | 0.414           |
|                        | 13   | q14.2-q14.3   | 48,298,134         | 50,803,969        | 2,505,835           | loss        | -1.302          |
|                        | 18   | pter-p11.21   | 1,543              | 15,349,282        | 15,347,739          | loss        | -0.465          |
| CLL006_pre-treatment   | 13   | q14.3         | 49,194,906         | 49,862,328        | 667,422             | loss        | -0.958          |
| CLL006_first treatment | 11   | q22.3-qter    | 107,106,130        | 134,449,982       | 27,343,852          | loss        | -0.200          |
|                        | 13   | q14.3         | 49,194,906         | 49,862,328        | 667,422             | loss        | -1.134          |
| CLL007_pre-treatment   | 2    | pter-p11.1    | 2,772              | 91,669,524        | 91,666,752          | gain        | 0.545           |
|                        | 6    | q23.3-q24.1   | 135,762,978        | 139,629,812       | 3,866,834           | loss        | -0.750          |
|                        |      | q25.2-q25.3   | 155,389,629        | 158,555,754       | 3,166,125           | loss        | -0.814          |
|                        | 13   | q14.2-q14.3   | 48,602,737         | 50,805,800        | 2,203,063           | loss        | -0.741          |
|                        | 18   | pter-p11.21   | 1,543              | 15,344,955        | 15,343,412          | loss        | -0.453          |
| CLL007_first treatment | 2    | pter-p11.1    | 2,772              | 91,669,524        | 91,666,752          | gain        | 0.655           |
|                        | 6    | q23.3-q24.1   | 135,762,978        | 139,629,812       | 3,866,834           | loss        | -1.060          |
|                        |      | q25.2-q25.3   | 155,389,629        | 158,555,754       | 3,166,125           | loss        | -1.141          |
|                        | 13   | q14.2-q14.3   | 48,602,737         | 50,805,800        | 2,203,063           | loss        | -1.060          |
|                        | 18   | pter-p11.21   | 1,543              | 15,344,955        | 15,343,412          | loss        | -0.854          |
| CLL008_pre-treatment   | /    |               |                    |                   |                     |             |                 |
| CLL008_first treatment | /    |               |                    |                   |                     |             |                 |
| CLL009_pre-treatment   | 11   | q22.3-q23.3   | 102,440,047        | 115,759,135       | 13,319,088          | loss        | -0.701          |
|                        | 13   | q14.11-q21.33 | 40,410,699         | 67,857,615        | 27,446,916          | loss        | -0.378          |
| CLL009_first treatment | 11   | q22.3-q23.3   | 102,440,047        | 115,759,135       | 13,319,088          | loss        | -1.140          |
|                        | 13   | q14.11-q21.33 | 40,410,699         | 67,857,615        | 27,446,916          | loss        | -0.649          |
| CLL010_pre-treatment   | 6    | q21           | 106,651,253        | 109,958,630       | 3,307,377           | loss        | -0.843          |
|                        | 13   | q14.13-q14.2  | 46,186,341         | 47,128,170        | 941,829             | loss        | -0.789          |
|                        | 13   | q14.2-q14.3   | 48,075,880         | 51,239,182        | 3,163,302           | loss        | -0.738          |

| ID                     | Chr. | Cytoband      | Segment Start [bp] | Segment Stop [bp] | Segment Length [bp] | Type of CNA | Mean Log2 Ratio |
|------------------------|------|---------------|--------------------|-------------------|---------------------|-------------|-----------------|
| CLL010_first treatment | 6    | q21           | 106,651,253        | 109,958,630       | 3,307,377           | loss        | -1.089          |
|                        | 13   | q14.13-q14.2  | 46,186,341         | 47,128,170        | 941,829             | loss        | -1.045          |
|                        |      | q14.2-q14.3   | 48,075,880         | 51,239,182        | 3,163,302           | loss        | -1.083          |
| CLL011_pre-treatment   | 11   | q14.3-q23.3   | 89,903,864         | 117,335,486       | 27,431,622          | loss        | -0.208          |
|                        | 13   | q14.2-q14.3   | 47,624,061         | 50,735,656        | 3,111,595           | loss        | -0.389          |
| CLL011_first treatment | 2    | p22.2-p22.1   | 37,191,614         | 38,946,905        | 1,755,291           | loss        | -0.409          |
|                        |      | p21           | 42,802,516         | 46,748,828        | 3,946,312           | loss        | -0.383          |
|                        | 11   | q14.3-q23.3   | 89,903,864         | 117,335,486       | 27,431,622          | loss        | -0.558          |
|                        | 13   | q14.2-q14.3   | 47,624,061         | 50,735,656        | 3,111,595           | loss        | -0.637          |
| CLL012_pre-treatment   | 2    | pter-p11.1    | 2,772              | 91,669,524        | 91,666,752          | gain        | 0.521           |
|                        | 13   | q14.2-q21.1   | 47,909,686         | 54,506,513        | 6,596,827           | loss        | -0.187          |
|                        | 20   | pter-p11.1    | 9,293              | 26,253,567        | 26,244,274          | loss        | -0.658          |
|                        | 23   | pter-qter     | 108,465            | 154,907,376       | 154,798,911         | loss        | -0.968          |
| CLL012_first treatment | 2    | pter-p11.1    | 2,772              | 91,669,524        | 91,666,752          | gain        | 0.690           |
|                        | 13   | q14.2-q21.1   | 47,909,686         | 54,506,513        | 6,596,827           | loss        | -0.237          |
|                        | 20   | pter-p11.1    | 9,293              | 26,253,567        | 26,244,274          | loss        | -1.102          |
|                        | 23   | pter-qter     | 108,465            | 154,907,376       | 154,798,911         | loss        | -0.968          |
| CLL013_pre-treatment   | 13   | q14.3         | 49,503,795         | 50,292,826        | 789,031             | loss        | -0.401          |
| CLL013_first treatment | 2    | q24.3-q31.1   | 167,124,684        | 170,891,195       | 3,766,511           | loss        | -0.833          |
|                        |      | q31.2-q31.3   | 178,272,541        | 180,648,285       | 2,375,744           | loss        | -0.848          |
|                        |      | q31.3-q32.1   | 182,257,505        | 183,959,860       | 1,702,355           | loss        | -0.813          |
|                        |      | q33.3-q34     | 208,884,589        | 210,984,140       | 2,099,551           | loss        | -0.851          |
|                        | 5    | p15.32-p15.31 | 5,448,826          | 6,695,426         | 1,246,600           | loss        | -0.902          |
|                        |      | q22.2-q22.3   | 113,020,008        | 113,424,277       | 404,269             | loss        | -0.816          |
|                        |      | q22.3         | 113,699,667        | 113,743,974       | 44,307              | loss        | -0.822          |
|                        |      | q22.3-q23.1   | 114,158,360        | 116,586,372       | 2,428,012           | loss        | -0.866          |
|                        |      | q23.1-q23.3   | 120,729,374        | 127,600,968       | 6,871,594           | loss        | -0.860          |
|                        | 9    | q31.2-q31.3   | 107,344,321        | 111,576,250       | 4,231,929           | loss        | -0.890          |
|                        | 11   | q13.5-q14.1   | 76,554,922         | 77,510,511        | 955,589             | loss        | -0.945          |
|                        |      | q14.1         | 80,904,528         | 84,177,562        | 3,273,034           | loss        | -0.856          |
|                        |      | q22.3-q23.3   | 105,914,199        | 117,557,981       | 11,643,782          | loss        | -0.851          |
|                        | 13   | q14.12-q21.33 | 44,594,072         | 69,758,769        | 25,164,697          | loss        | -0.904          |
| CLL014_pre-treatment   | 13   | q14.3         | 49,459,406         | 50,557,748        | 1,098,342           | loss        | -0.531          |
| CLL014_first treatment | 13   | q14.3         | 49,459,406         | 50,557,748        | 1,098,342           | loss        | -0.710          |
| CLL015_pre-treatment   | /    |               |                    |                   |                     |             |                 |
| CLL015_first treatment | /    |               |                    |                   |                     |             |                 |
| CLL016_pre-treatment   | 13   | q14.2-q14.3   | 47,884,307         | 51,722,294        | 3,837,987           | loss        | -0.892          |
|                        |      | q14.2         | 49,492,402         | 50,076,715        | 584,313             | loss        | -2.746          |
|                        | 15   | q15.1         | 38,192,659         | 38,591,866        | 399,207             | loss        | -0.670          |
| CLL016_first treatment | 13   | q14.2-q14.3   | 47,884,307         | 51,722,294        | 3,837,987           | loss        | -1.155          |
|                        |      | q14.2         | 49,492,402         | 50,076,715        | 584,313             | loss        | -4.060          |
|                        | 15   | q15.1         | 38,192,659         | 38,591,866        | 399,207             | loss        | -0.965          |
| CLL017_pre-treatment   | 2    | pter-p14      | 2,772              | 64,576,971        | 64,574,199          | gain        | 0.311           |
|                        | 11   | q21-q23.3     | 93,116,414         | 116,589,589       | 23,473,175          | loss        | -0.919          |
|                        | 13   | q14.2-q14.3   | 47,731,755         | 50,432,175        | 2,700,420           | loss        | -0.870          |
| CLL017_first treatment | 2    | pter-p14      | 2,772              | 64,576,971        | 64,574,199          | gain        | 0.450           |
|                        | 11   | q21-q23.3     | 93,116,414         | 116,589,589       | 23,473,175          | loss        | -1.044          |
|                        | 13   | q14.2-q14.3   | 47,731,755         | 50,432,175        | 2,700,420           | loss        | -1.107          |



| ID                     | Chr.       | Cytoband      | Segment Start [bp] | Segment Stop [bp] | Segment Length [bp] | Type of CNA | Mean Log2 Ratio |
|------------------------|------------|---------------|--------------------|-------------------|---------------------|-------------|-----------------|
| CLL018_pre-treatment   | 11         | q22.3         | 107,595,005        | 107,673,512       | 78,507              | loss        | -0.968          |
|                        | 13         | q14.2-q14.3   | 48,703,750         | 50,798,935        | 2,095,185           | loss        | -0.964          |
| CLL018_first-treatment | 11         | q22.3         | 107,595,005        | 107,673,512       | 78,507              | loss        | -1.073          |
|                        | 13         | q14.2-q14.3   | 48,703,750         | 50,798,935        | 2,095,185           | loss        | -1.032          |
| CLL018_post treatment  | 4          | q35.1         | 184,986,264        | 186,628,021       | 1,641,757           | loss        | -0.960          |
|                        | 8          | q11.23        | 54,781,951         | 55,403,044        | 621,093             | loss        | -0.911          |
|                        |            | q12.1-q12.3   | 59,482,605         | 62,600,010        | 3,117,405           | loss        | -0.944          |
|                        | 11         | q22.3         | 107,595,005        | 107,673,512       | 78,507              | loss        | -1.176          |
|                        | 13         | q12.3         | 29,494,429         | 30,563,278        | 1,068,849           | loss        | -0.980          |
|                        |            | q14.11-q14.12 | 43,377,000         | 44,303,421        | 926,421             | loss        | -0.890          |
| q14.2-q14.3            |            | 48,370,486    | 52,055,307         | 3,684,821         | loss                | -1.061      |                 |
| CLL019_pre-treatment   | /          |               |                    |                   |                     |             |                 |
| CLL019_first treatment | /          |               |                    |                   |                     |             |                 |
| CLL019_post treatment  | /          |               |                    |                   |                     |             |                 |
| CLL020_pre-treatment   | 13         | q14.3         | 49,448,082         | 50,422,445        | 974,363             | loss        | -0.516          |
| CLL020_first treatment | 13         | q14.3         | 49,448,082         | 50,422,445        | 974,363             | loss        | -1.211          |
| CLL020_post treatment  | 13         | q14.3         | 49,448,082         | 50,422,445        | 974,363             | loss        | -1.402          |
| CLL021_pre-treatment   | 11         | q22.1-q23.2   | 97,149,969         | 113,906,162       | 16,756,193          | loss        | -0.765          |
|                        | 13         | q14.12-q31.1  | 45,074,613         | 77,994,851        | 32,920,238          | loss        | -0.539          |
| CLL021_first treatment | 11         | q22.1-q23.2   | 97,149,969         | 113,906,162       | 16,756,193          | loss        | -0.998          |
|                        | 13         | q14.12-q31.1  | 45,074,613         | 77,994,851        | 32,920,238          | loss        | -0.851          |
| CLL021_post treatment  | 11         | q22.1-q23.2   | 97,149,969         | 113,906,162       | 16,756,193          | loss        | -0.957          |
|                        | 13         | q14.12-q31.1  | 45,074,613         | 77,994,851        | 32,920,238          | loss        | -0.791          |
| CLL022_pre-treatment   | 2          | pter-p13.1    | 2,772              | 75,006,008        | 75,003,236          | gain        | 0.275           |
|                        | 17         | pter-p12      | 514                | 14,770,640        | 14,770,126          | loss        | -0.846          |
|                        | 20         | pter-p11.1    | 9,293              | 26,253,567        | 26,244,274          | loss        | -0.866          |
| CLL022_first treatment | 2          | pter-p13.1    | 2,772              | 75,006,008        | 75,003,236          | gain        | 0.374           |
|                        | 17         | pter-p12      | 514                | 14,770,640        | 14,770,126          | loss        | -1.035          |
|                        | 20         | pter-p11.1    | 9,293              | 26,253,567        | 26,244,274          | loss        | -1.028          |
| CLL022_post treatment  | 2          | pter-p13.1    | 2,772              | 75,006,008        | 75,003,236          | gain        | 0.273           |
|                        | 6          | q14.2-q22.31  | 84,597,781         | 122,882,024       | 38,284,243          | loss        | -0.205          |
|                        | 15         | q15.1-q15.2   | 39,347,452         | 40,762,345        | 1,414,893           | loss        | -0.370          |
|                        | 17         | pter-p11.2    | 514                | 19,641,940        | 19,641,426          | loss        | -0.561          |
|                        | 18         | q12.3-q21.2   | 38,228,591         | 46,836,322        | 8,607,731           | loss        | -0.325          |
|                        |            | q21.33-q22.1  | 58,240,849         | 61,387,498        | 3,146,649           | gain        | 0.344           |
|                        |            | q22.1-q22.2   | 64,246,823         | 66,423,049        | 2,176,226           | loss        | -0.268          |
|                        |            | q22.3-q23     | 68,282,684         | 74,708,523        | 6,425,839           | gain        | 0.465           |
|                        | 20         | q23           | 75,323,271         | 75,929,588        | 606,317             | loss        | -0.474          |
|                        |            | pter-p11.1    | 9,293              | 26,253,567        | 26,244,274          | loss        | -0.611          |
| q11.1-q11.23           |            | 28,034,001    | 34,789,022         | 6,755,021         | gain                | 0.483       |                 |
| q11.23                 | 35,155,757 | 36,893,876    | 1,738,119          | loss              | -0.397              |             |                 |
| CLL023_pre-treatment   | 6          | q16.1-q24.3   | 98,606,328         | 147,706,364       | 49,100,036          | loss        | -0.858          |
| CLL023_first treatment | 6          | q16.1-q24.3   | 98,606,328         | 147,706,364       | 49,100,036          | loss        | -0.924          |
| CLL023_post treatment  | 1          | p31.3-p31.1   | 65,599,504         | 70,346,813        | 4,747,309           | loss        | -0.201          |
|                        |            | p22.1-p21.2   | 94,432,914         | 99,934,869        | 5,501,955           | loss        | -0.202          |
|                        |            | q24.1         | 165,835,065        | 168,271,346       | 2,436,281           | loss        | -0.206          |
|                        | 5          | q23.2-q23.3   | 126,240,356        | 129,454,317       | 3,213,961           | loss        | -0.206          |
|                        |            | q31.2-q31.3   | 138,990,701        | 140,075,659       | 1,084,958           | loss        | -0.276          |

| ID                     | Chr.       | Cytoband      | Segment Start [bp] | Segment Stop [bp] | Segment Length [bp] | Type of CNA | Mean Log2 Ratio |
|------------------------|------------|---------------|--------------------|-------------------|---------------------|-------------|-----------------|
| CLL023_post treatment  | 5          | q32-q33.1     | 146,109,319        | 149,427,821       | 3,318,502           | loss        | -0.219          |
|                        |            | q34           | 160,291,039        | 163,845,473       | 3,554,434           | loss        | -0.206          |
|                        | 6          | q16.1-q24.3   | 98,606,328         | 147,706,364       | 49,100,036          | loss        | -0.906          |
|                        |            | 17            | pter-p11.2         | 514               | 21,459,693          | 21,459,179  | loss            |
|                        | p11.2-qter |               | 21,464,753         | 83,039,576        | 61,574,823          | gain        | 0.677           |
| CLL024_pre-treatment   | 2          | p21-p16.3     | 42,506,338         | 48,582,437        | 6,076,099           | loss        | -0.220          |
|                        |            | q11.2         | 96,099,907         | 100,948,166       | 4,848,259           | loss        | -0.230          |
|                        |            | q13           | 111,159,726        | 112,194,596       | 1,034,870           | loss        | -0.253          |
|                        |            | q13-q14.1     | 113,366,647        | 115,093,496       | 1,726,849           | loss        | -0.217          |
|                        |            | q21.3-q22.1   | 135,157,628        | 136,837,001       | 1,679,373           | loss        | -0.235          |
|                        |            | q31.1         | 171,514,116        | 172,077,646       | 563,530             | loss        | -0.211          |
|                        | 6          | q33.1-q33.2   | 201,421,699        | 204,439,764       | 3,018,065           | loss        | -0.232          |
|                        |            | q16.3         | 99,940,646         | 100,655,509       | 714,863             | loss        | -0.203          |
|                        |            | q21           | 107,019,802        | 111,427,533       | 4,407,731           | loss        | -0.212          |
|                        |            | q22.1-q22.2   | 116,738,405        | 117,120,247       | 381,842             | loss        | -0.200          |
|                        |            | q22.31-q22.32 | 126,188,635        | 126,494,744       | 306,109             | loss        | -0.204          |
|                        | 11         | q25.2-q25.3   | 154,970,578        | 159,602,252       | 4,631,674           | loss        | -0.213          |
|                        |            | q13.5-q23.3   | 76,242,150         | 116,833,299       | 40,591,149          | loss        | -0.259          |
|                        | 13         | q14.11-q14.2  | 40,484,054         | 48,085,207        | 7,601,153           | loss        | -0.749          |
|                        |            | q14.3         | 49,402,802         | 50,221,488        | 818,686             | loss        | -0.755          |
|                        | 14         | q23.2-q24.3   | 62,817,387         | 74,554,926        | 11,737,539          | loss        | -0.200          |
| CLL024_first treatment | 2          | p21-p16.3     | 42,506,338         | 48,582,437        | 6,076,099           | loss        | -0.290          |
|                        |            | q11.2         | 96,099,907         | 100,948,166       | 4,848,259           | loss        | -0.330          |
|                        |            | q13           | 111,159,726        | 112,194,596       | 1,034,870           | loss        | -0.278          |
|                        |            | q13-q14.1     | 113,366,647        | 115,093,496       | 1,726,849           | loss        | -0.317          |
|                        |            | q21.3-q22.1   | 135,157,628        | 136,837,001       | 1,679,373           | loss        | -0.328          |
|                        |            | q31.1         | 171,514,116        | 172,077,646       | 563,530             | loss        | -0.411          |
|                        | 6          | q33.1-q33.2   | 201,421,699        | 204,439,764       | 3,018,065           | loss        | -0.353          |
|                        |            | q16.3         | 99,940,646         | 100,655,509       | 714,863             | loss        | -0.399          |
|                        |            | q21           | 107,019,802        | 111,427,533       | 4,407,731           | loss        | -0.366          |
|                        |            | q22.1-q22.2   | 116,738,405        | 117,120,247       | 381,842             | loss        | -0.317          |
|                        |            | q22.31-q22.32 | 126,188,635        | 126,494,744       | 306,109             | loss        | -0.261          |
|                        | 11         | q25.2-q25.3   | 154,970,578        | 159,602,252       | 4,631,674           | loss        | -0.268          |
|                        |            | q13.5-q23.3   | 76,242,150         | 116,833,299       | 40,591,149          | loss        | -0.463          |
|                        | 13         | q14.11-q14.2  | 40,484,054         | 48,085,207        | 7,601,153           | loss        | -1.060          |
|                        |            | q14.3         | 49,402,802         | 50,221,488        | 818,686             | loss        | -0.995          |
|                        | 14         | q23.2-q24.3   | 62,817,387         | 74,554,926        | 11,737,539          | loss        | -0.364          |
| CLL024_post treatment  | 2          | p21-p16.3     | 42,506,338         | 48,582,437        | 6,076,099           | loss        | -0.378          |
|                        |            | q11.2         | 96,099,907         | 100,948,166       | 4,848,259           | loss        | -0.389          |
|                        |            | q13           | 111,159,726        | 112,194,596       | 1,034,870           | loss        | -0.392          |
|                        |            | q13-q14.1     | 113,366,647        | 115,093,496       | 1,726,849           | loss        | -0.375          |
|                        |            | q21.3-q22.1   | 135,157,628        | 136,837,001       | 1,679,373           | loss        | -0.384          |
|                        |            | q31.1         | 171,514,116        | 172,077,646       | 563,530             | loss        | -0.374          |
|                        | 6          | q33.1-q33.2   | 201,421,699        | 204,439,764       | 3,018,065           | loss        | -0.334          |
|                        |            | q16.3         | 99,940,646         | 100,655,509       | 714,863             | loss        | -0.337          |
|                        |            | q21           | 107,019,802        | 111,427,533       | 4,407,731           | loss        | -0.357          |
|                        |            | q22.1-q22.2   | 116,738,405        | 117,120,247       | 381,842             | loss        | -0.333          |
|                        |            | q22.31-q22.32 | 126,188,635        | 126,494,744       | 306,109             | loss        | -0.462          |
|                        |            | q25.2-q25.3   | 154,970,578        | 159,602,252       | 4,631,674           | loss        | -0.363          |

| ID                     | Chr. | Cytoband     | Segment Start [bp] | Segment Stop [bp] | Segment Length [bp] | Type of CNA | Mean Log2 Ratio |
|------------------------|------|--------------|--------------------|-------------------|---------------------|-------------|-----------------|
| CLL024_post treatment  | 11   | q13.5-q23.3  | 76,242,150         | 116,833,299       | 40,591,149          | loss        | -0.435          |
|                        | 13   | q14.11-q14.2 | 40,484,054         | 48,085,207        | 7,601,153           | loss        | -0.969          |
|                        |      | q14.3        | 49,402,802         | 50,221,488        | 818,686             | loss        | -1.029          |
|                        | 14   | q23.2-q24.3  | 62,817,387         | 74,554,926        | 11,737,539          | loss        | -0.391          |
| CLL025_pre-treatment   | /    |              |                    |                   |                     |             |                 |
| CLL025_first treatment | 11   | q22.2-q23.3  | 101,742,930        | 117,358,823       | 15,615,893          | loss        | -0.272          |
| CLL025_post treatment  | 1    | p32.1        | 58,970,739         | 59,719,908        | 749,169             | loss        | -0.291          |
|                        |      | p31.3        | 66,193,246         | 66,625,424        | 432,178             | loss        | -0.364          |
|                        |      | p31.3        | 67,830,804         | 68,015,985        | 185,181             | loss        | -0.467          |
|                        |      | p21.2        | 101,158,767        | 101,617,094       | 458,327             | loss        | -0.320          |
|                        | 4    | q35.1        | 185,234,241        | 185,965,246       | 731,005             | loss        | -0.329          |
|                        | 11   | q22.2-q23.3  | 101,742,930        | 117,358,823       | 15,615,893          | loss        | -0.388          |
|                        | 13   | q14.3        | 49,418,137         | 50,336,803        | 918,666             | loss        | -0.287          |
| CLL026_pre-treatment   | 2    | p16.1-p14    | 59,872,879         | 65,054,127        | 5,181,248           | gain        | 0.781           |
|                        | 11   | q22.1-q25    | 98,736,516         | 131,952,204       | 33,215,688          | loss        | -0.578          |
|                        | 13   | q14.2-q21.2  | 46,297,419         | 57,660,246        | 11,362,827          | loss        | -0.496          |
| CLL026_first treatment | 2    | p16.1-p14    | 59,872,879         | 65,054,127        | 5,181,248           | gain        | 0.526           |
|                        | 11   | q21-q25      | 95,944,605         | 131,952,204       | 36,007,599          | loss        | -0.602          |
|                        |      | q22.1-q23.2  | 98,736,516         | 114,423,576       | 15,687,060          | loss        | -1.219          |
|                        | 13   | q14.12-q21.2 | 45,510,837         | 57,660,246        | 12,149,409          | loss        | -0.553          |
|                        |      | q14.2-q14.3  | 46,297,419         | 51,639,572        | 5,342,153           | loss        | -1.161          |
| CLL026_post treatment  | 11   | q21-q23.2    | 95,944,605         | 114,423,576       | 18,478,971          | loss        | -0.497          |
|                        | 13   | q14.12-q14.3 | 45,510,837         | 51,639,572        | 6,128,735           | loss        | -0.711          |
| CLL027_pre-treatment   | 17   | pter-p11.2   | 514                | 19,685,972        | 19,685,458          | loss        | -0.187          |
|                        |      | q11.1        | 22,367,498         | 23,188,621        | 821,123             | loss        | -0.179          |
| CLL027_first treatment | 17   | pter-p11.2   | 514                | 19,685,972        | 19,685,458          | loss        | -0.225          |
|                        |      | q11.1        | 22,367,498         | 23,188,621        | 821,123             | loss        | -0.208          |
| CLL027_post treatment  | 17   | pter-p11.2   | 514                | 19,685,972        | 19,685,458          | loss        | -1.212          |
|                        |      | q11.1        | 22,367,498         | 23,188,621        | 821,123             | loss        | -1.017          |
|                        | 23   | p22.33-p21.1 | 2,642,482          | 32,166,406        | 29,523,924          | gain        | 1.841           |
| CLL028_first treatment | 11   | q14.2-q23.3  | 85,717,189         | 117,447,057       | 31,729,868          | loss        | -0.425          |
|                        |      | q22.1-q23.2  | 98,182,183         | 114,949,627       | 16,767,444          | loss        | -0.929          |
|                        | 21   | p11.2-q22.3  | 9,758,730          | 46,921,373        | 37,162,643          | gain        | 0.283           |
| CLL028_post treatment  | 11   | q14.2-q23.3  | 85,717,189         | 117,447,057       | 31,729,868          | loss        | -0.942          |
|                        | 13   | q14.12-q22.1 | 45,288,077         | 72,929,178        | 27,641,101          | loss        | -0.717          |
| CLL029_first treatment | 13   | q14.11-q22.2 | 42,277,674         | 75,616,878        | 33,339,204          | loss        | -0.507          |
|                        |      | q14.3        | 49,512,600         | 50,652,950        | 1,140,350           | loss        | -1.069          |
|                        | 14   | q24.3        | 75,152,557         | 75,614,215        | 461,658             | loss        | -0.508          |
|                        | 20   | q11.23       | 34,442,753         | 35,063,639        | 620,886             | loss        | -0.422          |
| CLL029_post treatment  | 13   | q14.11-q22.2 | 42,277,674         | 75,616,878        | 33,339,204          | loss        | -0.991          |
|                        | 14   | q24.3        | 75,152,557         | 75,614,215        | 461,658             | loss        | -0.905          |
|                        | 20   | q11.23       | 34,442,753         | 35,063,639        | 620,886             | loss        | -0.422          |
| CLL030_first treatment | 13   | q14.2-q14.3  | 48,649,465         | 50,708,954        | 2,059,489           | loss        | -0.993          |
|                        | 13   | q14.3        | 49,458,298         | 50,378,108        | 919,810             | loss        | -2.600          |
| CLL030_post treatment  | 13   | q14.2-q14.3  | 48,649,465         | 50,708,954        | 2,059,489           | loss        | -0.708          |
|                        |      | q14.3        | 49,458,298         | 50,378,108        | 919,810             | loss        | -2.127          |
|                        | 17   | pter-p11.2   | 514                | 21,459,693        | 21,459,179          | loss        | -0.660          |
|                        | 20   | p11.21       | 22,324,280         | 24,395,367        | 2,071,087           | loss        | -0.380          |
| q11.21-q11.22          |      | 29,339,493   | 32,302,369         | 2,962,876         | loss                | -0.328      |                 |

| ID                     | Chr.          | Cytoband      | Segment Start [bp] | Segment Stop [bp] | Segment Length [bp] | Type of CNA | Mean Log2 Ratio |
|------------------------|---------------|---------------|--------------------|-------------------|---------------------|-------------|-----------------|
| CLL030_post treatment  | 20            | q11.23-q13.12 | 35,233,455         | 43,928,462        | 8,695,007           | loss        | -0.382          |
| CLL031_first treatment | 13            | q14.12-q31.2  | 45,820,540         | 88,245,320        | 42,424,780          | loss        | -0.849          |
|                        | 17            | pter-p11.1    | 514                | 22,159,777        | 22,159,263          | loss        | -0.792          |
| CLL031_post treatment  | 20            | pter-p11.1    | 9,293              | 26,125,093        | 26,115,800          | loss        | -0.447          |
|                        | 13            | q14.12-q31.2  | 45,820,540         | 88,245,320        | 42,424,780          | loss        | -0.674          |
|                        | 17            | pter-p11.1    | 514                | 22,159,777        | 22,159,263          | loss        | -0.605          |
| CLL032_first treatment | 20            | pter-p11.1    | 9,293              | 26,125,093        | 26,115,800          | loss        | -0.359          |
|                        | 11            | q14.1-q23.3   | 77,298,348         | 115,713,523       | 38,415,175          | loss        | -0.724          |
| CLL032_post treatment  | 11            | q14.1-q23.3   | 77,298,348         | 115,713,523       | 38,415,175          | loss        | -0.583          |
|                        | 13            | q13.3-q14.3   | 36,882,149         | 51,268,511        | 14,386,362          | loss        | -0.413          |
| CLL033_first treatment | 12            | pter-qter     | 20,691             | 132,288,250       | 132,267,559         | gain        | 0.562           |
| CLL033_post treatment  | 12            | pter-qter     | 20,691             | 132,288,250       | 132,267,559         | gain        | 0.601           |
| CLL034_first treatment | /             |               |                    |                   |                     |             |                 |
| CLL034_post treatment  | /             |               |                    |                   |                     |             |                 |
| CLL035_first treatment | 17            | p13.3-p11.1   | 514                | 22,159,777        | 22,159,263          | loss        | -0.200          |
| CLL035_post treatment  | 6             | p25.2-p25.1   | 3,633,985          | 6,361,078         | 2,727,093           | loss        | -0.433          |
|                        |               | p24.3-p22.3   | 10,339,898         | 16,922,244        | 6,582,346           | loss        | -0.416          |
|                        |               | p22.3-p22.1   | 20,921,354         | 26,813,566        | 5,892,212           | loss        | -0.377          |
|                        |               | p21.31-p21.1  | 36,455,686         | 41,480,026        | 5,024,340           | loss        | -0.340          |
|                        |               | p21.1-p12.3   | 42,192,494         | 49,960,509        | 7,768,015           | loss        | -0.437          |
|                        |               | p12.1         | 53,719,699         | 54,362,058        | 642,359             | loss        | -0.333          |
|                        | 8             | pter-q11.21   | 21,242             | 50,018,661        | 49,997,419          | loss        | -0.396          |
|                        | 17            | pter-p11.1    | 514                | 22,159,777        | 22,159,263          | loss        | -0.910          |
| CLL036_first treatment | 13            | q14.3         | 49,380,179         | 50,519,784        | 1,139,605           | loss        | -0.862          |
| CLL036_post treatment  | 13            | q14.3         | 49,380,179         | 50,519,784        | 1,139,605           | loss        | -1.007          |
| CLL037_first treatment | 12            | pter-qter     | 20,691             | 132,288,250       | 132,267,559         | gain        | 0.575           |
| CLL037_post treatment  | 12            | pter-qter     | 20,691             | 132,288,250       | 132,267,559         | gain        | 0.692           |
| CLL038_first treatment | 13            | q14.3-q31.1   | 49,164,110         | 86,304,325        | 37,140,215          | loss        | -0.834          |
|                        |               | q14.3         | 49,482,488         | 50,345,355        | 862,867             | loss        | -2.463          |
|                        | 17            | q22           | 51,849,635         | 54,007,438        | 2,157,803           | loss        | -0.659          |
| CLL038_post treatment  | 13            | q14.3-q31.1   | 49,164,110         | 86,304,325        | 37,140,215          | loss        | -1.098          |
|                        |               | q14.3         | 49,482,488         | 50,345,355        | 862,867             | loss        | -3.483          |
|                        | 17            | q22           | 51,849,635         | 54,007,438        | 2,157,803           | loss        | -0.929          |
| CLL039_first treatment | 13            | q14.3         | 49,463,867         | 50,389,963        | 926,096             | loss        | -0.695          |
| CLL039_post treatment  | 2             | pter-p14      | 2,772              | 66,126,744        | 66,123,972          | gain        | 0.343           |
|                        | 11            | q14.1-q23.2   | 81,403,681         | 115,019,412       | 33,615,731          | loss        | -0.239          |
|                        | 13            | q14.3         | 49,463,867         | 50,389,963        | 926,096             | loss        | -0.298          |
| CLL040_first treatment | 11            | q22.1-q24.1   | 99,823,384         | 121,040,148       | 21,216,764          | loss        | -0.319          |
|                        | 13            | q14.3         | 49,459,406         | 50,539,162        | 1,079,756           | loss        | -0.832          |
|                        | 16            | p11.2-q21     | 33,283,373         | 57,035,890        | 23,752,517          | loss        | -0.551          |
|                        | 17            | pter-p11.2    | 514                | 19,092,779        | 19,092,265          | loss        | -0.574          |
| CLL040_post treatment  | 5             | p15.33        | 68,520             | 1,903,001         | 1,834,481           | gain        | 0.408           |
|                        |               | p15.2         | 8,794,893          | 9,213,497         | 418,604             | gain        | 0.493           |
|                        | 10            | p12.1-p11.22  | 26,036,002         | 33,817,413        | 7,781,411           | loss        | -0.605          |
|                        |               | p11.21-q21.2  | 34,563,897         | 63,258,313        | 28,694,416          | loss        | -0.587          |
|                        |               | q22.3-q23.1   | 81,684,333         | 86,496,284        | 4,811,951           | loss        | -0.594          |
|                        |               | q23.2-q25.3   | 89,545,776         | 118,121,011       | 28,575,235          | loss        | -0.591          |
|                        | q26.11-q26.13 | 120,622,800   | 123,120,748        | 2,497,948         | loss                | -0.557      |                 |

| ID                     | Chr. | Cytoband     | Segment Start [bp] | Segment Stop [bp] | Segment Length [bp] | Type of CNA | Mean Log2 Ratio |
|------------------------|------|--------------|--------------------|-------------------|---------------------|-------------|-----------------|
| CLL040_post treatment  | 11   | q22.1-q24.1  | 99,823,384         | 121,040,148       | 21,216,764          | loss        | -0.299          |
|                        | 13   | q14.3        | 49,459,406         | 50,539,162        | 1,079,756           | loss        | -0.963          |
|                        | 16   | p11.2-q21    | 33,283,373         | 57,035,890        | 23,752,517          | loss        | -0.881          |
|                        | 17   | pter-p11.2   | 514                | 19,092,779        | 19,092,265          | loss        | -0.903          |
|                        | 18   | pter-p11.22  | 1,543              | 10,116,963        | 10,115,420          | loss        | -0.621          |
|                        |      | p11.22       | 10,269,399         | 10,557,346        | 287,947             | loss        | -0.625          |
|                        |      | q12.3        | 39,041,193         | 40,091,974        | 1,050,781           | loss        | -0.568          |
|                        |      | q22.1        | 62,745,560         | 63,837,762        | 1,092,202           | loss        | -0.626          |
| CLL041_first treatment | 13   | q14.2-q14.3  | 48,349,864         | 50,589,398        | 2,239,534           | loss        | -1.013          |
| CLL041_post treatment  | 13   | q14.2-q14.3  | 48,349,864         | 50,589,398        | 2,239,534           | loss        | -0.878          |
| CLL042_first treatment | 13   | q14.3        | 49,389,952         | 50,598,450        | 1,208,498           | loss        | -1.047          |
| CLL042_post treatment  | 13   | q14.3        | 49,389,952         | 50,598,450        | 1,208,498           | loss        | -0.593          |
| CLL043_first treatment | /    |              |                    |                   |                     |             |                 |
| CLL043_post treatment  | 13   | q14.2-q14.3  | 47,365,868         | 50,556,183        | 3,190,315           | loss        | -0.269          |
| CLL044_first treatment | 11   | q22.1-q23.2  | 100,955,074        | 114,329,187       | 13,374,113          | loss        | -0.451          |
|                        | 13   | q14.11-q21.1 | 41,278,446         | 54,400,376        | 13,121,930          | loss        | -0.887          |
| CLL044_post treatment  | 2    | pter-p15     | 2,772              | 62,465,549        | 62,462,777          | gain        | 0.355           |
|                        | 11   | q14.1-q23.2  | 78,233,914         | 114,862,582       | 36,628,668          | loss        | -0.569          |
|                        | 13   | q14.11-q21.1 | 41,278,446         | 54,400,376        | 13,121,930          | loss        | -0.649          |
|                        | 17   | pter-p13.1   | 514                | 7,724,874         | 7,724,360           | loss        | -0.325          |
| CLL045_first treatment | 4    | p16.3-p15.2  | 2,819,825          | 26,607,609        | 23,787,784          | loss        | -0.861          |
| CLL045_post treatment  | 4    | p16.3-p15.2  | 2,819,825          | 26,607,609        | 23,787,784          | loss        | -0.533          |
| CLL046_first treatment | /    |              |                    |                   |                     |             |                 |
| CLL046_post treatment  | /    |              |                    |                   |                     |             |                 |
| CLL047_first treatment | 11   | q22.3-q23.3  | 102,676,275        | 118,022,794       | 15,346,519          | loss        | -0.200          |
| CLL047_post treatment  | 9    | p21.3        | 21,854,535         | 22,240,574        | 386,039             | loss        | -2.783          |
| CLL048_first treatment | 13   | q14.2-q14.3  | 46,763,020         | 51,766,291        | 5,003,271           | loss        | -0.735          |
| CLL048_post treatment  | 11   | q21-q24.2    | 94,541,819         | 124,492,143       | 29,950,324          | loss        | -0.505          |
|                        | 13   | q14.2-q14.3  | 46,763,020         | 51,766,291        | 5,003,271           | loss        | -1.083          |
| CLL049_first treatment | 11   | q13.5-q24.1  | 75,936,944         | 122,552,113       | 46,615,169          | loss        | -0.605          |
|                        | 13   | q14.2-q14.3  | 48,475,768         | 50,846,078        | 2,370,310           | loss        | -0.811          |
| CLL049_post treatment  | 11   | q13.5-q24.1  | 75,936,944         | 122,552,113       | 46,615,169          | loss        | -0.747          |
|                        | 13   | q14.2-q14.3  | 48,475,768         | 50,846,078        | 2,370,310           | loss        | -0.776          |
| CLL050_first treatment | 6    | p21.31-p21.2 | 35,944,040         | 36,831,550        | 887,510             | loss        | -0.627          |
|                        | 11   | q22.1-q23.2  | 99,367,917         | 113,786,697       | 14,418,780          | loss        | -0.345          |
|                        | 13   | q14.3        | 49,332,419         | 50,475,702        | 1,143,283           | loss        | -0.483          |
| CLL050_post treatment  | 6    | p21.31-p21.2 | 35,944,040         | 36,831,550        | 887,510             | loss        | -0.614          |
|                        | 11   | q22.1-q23.2  | 99,367,917         | 113,786,697       | 14,418,780          | loss        | -0.558          |
|                        | 13   | q14.3        | 49,332,419         | 50,475,702        | 1,143,283           | loss        | -0.937          |
| CLL051_first treatment | /    |              |                    |                   |                     |             |                 |
| CLL051_post treatment  | /    |              |                    |                   |                     |             |                 |
| CLL052_first treatment | /    |              |                    |                   |                     |             |                 |
| CLL052_post treatment  | /    |              |                    |                   |                     |             |                 |
| CLL053_first treatment | 13   | q14.3        | 48,987,845         | 50,735,669        | 1,747,824           | loss        | -0.292          |
| CLL053_post treatment  | 13   | q14.3        | 48,987,845         | 50,735,669        | 1,747,824           | loss        | -0.615          |
| CLL054_first treatment | 11   | q22.1-q23.2  | 96,738,328         | 115,032,978       | 18,294,650          | loss        | -1.094          |
|                        | 13   | q14.2-q14.3  | 48,860,827         | 50,737,417        | 1,876,590           | loss        | -0.179          |
| CLL054_post treatment  | 11   | q22.1-q23.2  | 96,738,328         | 115,032,978       | 18,294,650          | loss        | -0.422          |

| ID                     | Chr.       | Cytoband      | Segment Start [bp] | Segment Stop [bp] | Segment Length [bp] | Type of CNA | Mean Log2 Ratio |
|------------------------|------------|---------------|--------------------|-------------------|---------------------|-------------|-----------------|
| CLL054_post treatment  | 17         | pter-q11.2    | 514                | 27,179,125        | 27,178,611          | loss        | -0.358          |
|                        |            | q21.33-q22    | 46,930,777         | 51,547,522        | 4,616,745           | loss        | -0.423          |
|                        | 18         | q12.3-q21.2   | 35,834,118         | 46,959,358        | 11,125,240          | loss        | -0.405          |
|                        |            | q21.33-q22.3  | 59,213,735         | 67,586,049        | 8,372,314           | loss        | -0.453          |
|                        |            | q23-qter      | 74,763,804         | 76,116,029        | 1,352,225           | loss        | -0.425          |
| CLL055_first treatment | 9          | q22.31-q22.33 | 94,564,580         | 100,662,573       | 6,097,993           | loss        | -1.041          |
|                        | 11         | q22.3-q23.3   | 107,407,997        | 116,209,813       | 8,801,816           | loss        | -1.030          |
|                        | 13         | q11-q12.12    | 17,924,937         | 23,078,358        | 5,153,421           | loss        | -1.034          |
|                        |            | q13.2-q13.3   | 34,245,835         | 39,115,091        | 4,869,256           | loss        | -0.974          |
|                        |            | q14.2-q14.3   | 47,080,027         | 50,001,462        | 2,921,435           | loss        | -0.983          |
|                        | 15         | q14-q15.1     | 32,451,387         | 39,315,978        | 6,864,591           | loss        | -0.985          |
|                        |            | q21.2.q21.3   | 50,042,147         | 54,732,740        | 4,690,593           | loss        | -0.973          |
|                        |            | q25.3-q26.1   | 83,956,291         | 87,312,981        | 3,356,690           | loss        | -1.012          |
|                        | 18         | q11.2-q12.1   | 22,410,136         | 26,153,938        | 3,743,802           | loss        | -0.968          |
|                        |            | q12.2-q12.3   | 32,367,728         | 37,920,913        | 5,553,185           | loss        | -0.977          |
|                        | q22.1-qter | 60,707,441    | 76,116,029         | 15,408,588        | loss                | -1.001      |                 |
| CLL055_post treatment  | 9          | q22.31-q22.33 | 94,564,580         | 100,662,573       | 6,097,993           | loss        | -0.623          |
|                        | 11         | q22.3-q23.3   | 107,407,997        | 116,209,813       | 8,801,816           | loss        | -0.728          |
|                        | 13         | q11-q12.12    | 17,924,937         | 23,078,358        | 5,153,421           | loss        | -0.659          |
|                        |            | q13.2-q13.3   | 34,245,835         | 39,115,091        | 4,869,256           | loss        | -0.737          |
|                        |            | q14.2-q14.3   | 47,080,027         | 50,001,462        | 2,921,435           | loss        | -0.724          |
|                        | 15         | q14-q15.1     | 32,451,387         | 39,315,978        | 6,864,591           | loss        | -0.717          |
|                        |            | q21.2.q21.3   | 50,042,147         | 54,732,740        | 4,690,593           | loss        | -0.698          |
|                        |            | q25.3-q26.1   | 83,956,291         | 87,312,981        | 3,356,690           | loss        | -0.695          |
|                        | 18         | q11.2-q12.1   | 22,410,136         | 26,153,938        | 3,743,802           | loss        | -0.761          |
|                        |            | q12.2-q12.3   | 32,367,728         | 37,920,913        | 5,553,185           | loss        | -0.727          |
|                        | q22.1-qter | 60,707,441    | 76,116,029         | 15,408,588        | loss                | -0.738      |                 |
| CLL056_first treatment | 11         | q21-q24.1     | 94,490,357         | 122,129,736       | 27,639,379          | loss        | -0.450          |
|                        | 13         | q13.3-q14.3   | 35,169,197         | 51,594,991        | 16,425,794          | loss        | -1.041          |
| CLL056_post treatment  | 11         | q21-q24.1     | 94,490,357         | 122,129,736       | 27,639,379          | loss        | -0.588          |
|                        | 13         | q13.3-q14.3   | 35,169,197         | 51,594,991        | 16,425,794          | loss        | -0.569          |
| CLL057_first treatment | 5          | q11.2         | 56,675,036         | 56,982,898        | 307,862             | loss        | -0.953          |
|                        | 11         | q22.1-q24.2   | 99,670,541         | 124,314,912       | 24,644,371          | loss        | -1.166          |
|                        | 13         | q14.2-q14.3   | 48,801,335         | 50,571,406        | 1,770,071           | loss        | -1.254          |
| CLL057_post treatment  | 5          | q11.2         | 56,675,036         | 56,982,898        | 307,862             | loss        | -0.535          |
|                        | 11         | q22.1-q24.2   | 99,670,541         | 124,314,912       | 24,644,371          | loss        | -0.515          |
|                        | 13         | q14.2-q14.3   | 48,801,335         | 50,571,406        | 1,770,071           | loss        | -0.586          |
| CLL058_first treatment | 2          | pter-p12      | 2,772              | 77,730,205        | 77,727,433          | gain        | 0.526           |
|                        | 4          | pter-p15.1    | 61,420             | 33,182,352        | 33,120,932          | loss        | -1.023          |
|                        | 7          | q31.1-qter    | 112,784,246        | 158,819,753       | 46,035,507          | gain        | 0.732           |
|                        | 11         | q22.1-q23.3   | 98,135,404         | 117,834,754       | 19,699,350          | loss        | -0.811          |
| CLL058_post treatment  | 2          | pter-p12      | 2,772              | 77,730,205        | 77,727,433          | gain        | 0.203           |
|                        | 4          | pter-p15.1    | 61,420             | 33,182,352        | 33,120,932          | loss        | -0.512          |
|                        | 7          | q31.1-qter    | 112,784,246        | 158,819,753       | 46,035,507          | gain        | 0.359           |
|                        | 11         | q22.1-q23.3   | 98,135,404         | 117,834,754       | 19,699,350          | loss        | -0.364          |
| CLL059_first treatment | 6          | q14.1-q22.32  | 82,423,220         | 126,819,982       | 44,396,762          | loss        | -0.341          |
|                        | 11         | q22.3-q24.1   | 105,740,221        | 122,854,886       | 17,114,665          | loss        | -1.058          |
| CLL059_post treatment  | 6          | q14.1-q22.32  | 82,423,220         | 126,819,982       | 44,396,762          | loss        | -0.212          |
|                        | 11         | q22.3-q24.1   | 105,740,221        | 122,854,886       | 17,114,665          | loss        | -0.519          |

| ID                     | Chr. | Cytoband      | Segment Start [bp] | Segment Stop [bp] | Segment Length [bp] | Type of CNA | Mean Log2 Ratio |
|------------------------|------|---------------|--------------------|-------------------|---------------------|-------------|-----------------|
| CLL060_first treatment | /    |               |                    |                   |                     |             |                 |
| CLL060_post treatment  | /    |               |                    |                   |                     |             |                 |
| CLL061_first treatment | /    |               |                    |                   |                     |             |                 |
| CLL061_post treatment  | 10   | p12.31-p12.2  | 22,731,302         | 23,268,210        | 536,908             | loss        | -0.574          |
|                        |      | q23.33-q26.13 | 97,574,534         | 126,794,121       | 29,219,587          | loss        | -0.456          |
| CLL062_first treatment | 12   | pter-qter     | 20,691             | 132,288,250       | 132,267,559         | gain        | 0.675           |
| CLL062_post treatment  | 12   | pter-qter     | 20,691             | 132,288,250       | 132,267,559         | gain        | 0.718           |
| CLL063_first treatment | 12   | pter-qter     | 20,691             | 132,288,250       | 132,267,559         | gain        | 0.687           |
| CLL063_post treatment  | 2    | p16.1-p15     | 58,663,874         | 61,886,833        | 3,222,959           | gain        | 0.477           |
|                        | 12   | pter-qter     | 20,691             | 132,288,250       | 132,267,559         | gain        | 0.483           |
|                        | 17   | pter-q11.1    | 514                | 22,387,513        | 22,386,999          | loss        | -0.487          |
| CLL064_first treatment | 2    | pter-p14      | 2,772              | 68,005,138        | 68,002,366          | gain        | 0.437           |
|                        | 13   | q14.3         | 49,418,137         | 50,544,950        | 1,126,813           | loss        | -0.781          |
|                        | 18   | q22.1-qter    | 63,110,340         | 76,116,029        | 13,005,689          | loss        | -0.433          |
| CLL064_post treatment  | 2    | pter-p14      | 2,772              | 68,005,138        | 68,002,366          | gain        | 0.533           |
|                        | 13   | q14.3         | 49,418,137         | 50,544,950        | 1,126,813           | loss        | -0.657          |
|                        | 18   | q22.1-qter    | 63,110,340         | 76,116,029        | 13,005,689          | loss        | -0.196          |
| CLL065_first treatment | /    |               |                    |                   |                     |             |                 |
| CLL065_post treatment  | /    |               |                    |                   |                     |             |                 |
| CLL066_first treatment | 13   | q14.12-q14.3  | 45,785,594         | 50,574,663        | 4,789,069           | loss        | -0.562          |
| CLL066_post treatment  | 13   | q14.12-q14.3  | 45,785,594         | 50,574,663        | 4,789,069           | loss        | -0.966          |
| CLL067_first treatment | 8    | pter-p21.3    | 21,242             | 23,056,820        | 23,035,578          | loss        | -0.638          |
|                        |      | q22.1-qter    | 95,913,614         | 146,268,947       | 50,355,333          | gain        | 0.548           |
|                        | 11   | q15.3-q23.3   | 76,605,673         | 115,877,785       | 39,272,112          | loss        | -0.892          |
|                        | 13   | q14.3         | 49,371,563         | 50,666,777        | 1,295,214           | loss        | -0.945          |
| CLL067_post treatment  | 8    | pter-p21.3    | 21,242             | 23,056,820        | 23,035,578          | loss        | -0.918          |
|                        |      | q22.1-qter    | 95,913,614         | 146,268,947       | 50,355,333          | gain        | 0.735           |
|                        | 11   | q15.3-q23.3   | 76,605,673         | 115,877,785       | 39,272,112          | loss        | -1.007          |
|                        | 13   | q14.3         | 49,371,563         | 50,666,777        | 1,295,214           | loss        | -0.916          |
|                        | 19   | pter-qter     | 41,898             | 63,789,654        | 63,747,756          | gain        | 0.276           |
| CLL068_first treatment | 11   | q14.1-q25     | 84,772,249         | 131,749,079       | 46,976,830          | loss        | -1.089          |
|                        | 13   | q14.3         | 49,515,159         | 49,952,914        | 437,755             | loss        | -1.088          |
| CLL068_post treatment  | 1    | q44           | 246,365,116        | 247,190,999       | 825,883             | gain        | 0.541           |
|                        | 3    | pter-p21.31   | 35,333             | 49,757,823        | 49,722,490          | loss        | -0.565          |
|                        | 3    | p14.1-q11.2   | 71,448,061         | 99,487,072        | 28,039,011          | loss        | -0.636          |
|                        |      | q12.3-q13.23  | 104,263,343        | 119,970,926       | 15,707,583          | loss        | -0.557          |
|                        | 4    | pter-q12      | 58,809             | 55,394,118        | 55,335,309          | loss        | -0.653          |
|                        | 6    | pter-p24.1    | 94,649             | 11,616,840        | 11,522,191          | gain        | 1.036           |
|                        | 11   | q22.1-q23.2   | 98,871,552         | 114,443,022       | 15,571,470          | loss        | -0.699          |
|                        |      | q23.3-q24.1   | 118,532,755        | 121,151,673       | 2,618,918           | loss        | -0.670          |
|                        | 11   | q25           | 132,556,301        | 134,449,982       | 1,893,681           | loss        | -0.620          |
|                        | 13   | q14.2-q31.1   | 47,206,915         | 77,876,017        | 30,669,102          | loss        | -0.657          |
|                        |      | q31.1         | 80,058,911         | 84,339,307        | 4,280,396           | loss        | -0.673          |
|                        |      | q31.3         | 90,823,104         | 91,066,296        | 243,192             | loss        | -0.651          |
|                        |      | q31.3-q32.1   | 91,762,283         | 96,252,811        | 4,490,528           | loss        | -0.651          |
|                        | 15   | q26.2-q26.3   | 93,362,859         | 100,286,551       | 6,923,692           | loss        | -0.624          |
|                        | 17   | pter-p11.2    | 514                | 19,034,166        | 19,033,652          | loss        | -0.622          |
| p11.2                  |      | 19,070,812    | 19,771,991         | 701,179           | gain                | 0.578       |                 |

| ID                     | Chr.   | Cytoband     | Segment Start [bp] | Segment Stop [bp] | Segment Length [bp] | Type of CNA | Mean Log2 Ratio |
|------------------------|--------|--------------|--------------------|-------------------|---------------------|-------------|-----------------|
| CLL068_post treatment  | 17     | p11.2-p11.1  | 20,988,007         | 22,143,683        | 1,155,676           | loss        | -0.551          |
|                        | 23     | p22.33       | 108,465            | 2,703,624         | 2,595,159           | gain        | 0.486           |
|                        |        | q28          | 154,596,513        | 154,843,251       | 246,738             | loss        | -0.969          |
|                        | 24     | pter-p11.1   | 169,542            | 11,244,519        | 11,074,977          | gain        | 0.850           |
|                        |        | q11.222-q12  | 20,585,200         | 27,209,311        | 6,624,111           | loss        | -1.076          |
| CLL069_first treatment | 11     | q12.2-q13.1  | 60,213,475         | 63,748,377        | 3,534,902           | loss        | -1.063          |
|                        |        | q13.5-q23.3  | 76,186,933         | 117,469,700       | 41,282,767          | loss        | -0.982          |
|                        |        | q23.3-q24.1  | 120,284,569        | 122,491,536       | 2,206,967           | loss        | -1.108          |
|                        |        | q24.1        | 122,545,918        | 122,900,680       | 354,762             | loss        | -1.133          |
|                        | 13     | q13.3-q21.2  | 36,628,508         | 60,160,245        | 23,531,737          | loss        | -0.999          |
| CLL069_post treatment  | 11     | q12.2-q13.1  | 60,213,475         | 63,748,377        | 3,534,902           | loss        | -1.024          |
|                        |        | q13.5-q23.3  | 76,186,933         | 117,469,700       | 41,282,767          | loss        | -0.989          |
|                        |        | q23.3-q24.1  | 120,284,569        | 122,491,536       | 2,206,967           | loss        | -1.065          |
|                        |        | q24.1        | 122,545,918        | 122,900,680       | 354,762             | loss        | -1.025          |
|                        | 13     | q13.3-q21.2  | 36,628,508         | 60,160,245        | 23,531,737          | loss        | -0.987          |
| CLL070_first treatment | 13     | q14.2-q14.3  | 48,745,013         | 51,287,744        | 2,542,731           | loss        | -0.479          |
| CLL070_post treatment  | 13     | q14.2-q14.3  | 48,745,013         | 51,286,766        | 2,541,753           | loss        | -0.376          |
|                        | 17     | pter-p11.2   | 514                | 20,549,240        | 20,548,726          | loss        | -0.320          |
| CLL071_first treatment | 6      | p21.31-p21.2 | 35,162,163         | 37,777,468        | 2,615,305           | loss        | -1.034          |
|                        | 13     | q14.2-q14.3  | 48,822,516         | 50,648,626        | 1,826,110           | loss        | -0.976          |
|                        | 15     | q15.1        | 38,527,153         | 40,003,310        | 1,476,157           | loss        | -0.907          |
| CLL071_post treatment  | 6      | p21.31-p21.2 | 35,162,163         | 37,777,468        | 2,602,109           | loss        | -0.915          |
|                        | 13     | q14.2-q14.3  | 48,822,516         | 50,648,626        | 1,826,110           | loss        | -0.934          |
|                        | 15     | q15.1        | 38,527,153         | 40,003,310        | 1,478,071           | loss        | -0.792          |
| CLL072_first treatment | 13     | q14.3        | 49,194,906         | 50,429,664        | 1,234,758           | loss        | -0.935          |
| CLL072_post treatment  | 13     | q14.3        | 49,194,906         | 50,429,664        | 1,234,758           | loss        | -0.860          |
| CLL073_first treatment | 11     | q22.2-q23.3  | 101,742,945        | 116,483,967       | 14,741,022          | loss        | -0.382          |
|                        | 13     | q14.11-q14.3 | 39,782,043         | 50,737,417        | 10,955,374          | loss        | -0.277          |
| CLL073_post treatment  | 4      | pter-q22.2   | 2,269              | 94,600,888        | 94,598,619          | loss        | -0.296          |
|                        | 6      | q16.3-q21    | 101,902,099        | 112,474,603       | 10,572,504          | loss        | -0.371          |
|                        |        | q22.1        | 116,543,892        | 117,051,238       | 507,346             | loss        | -0.746          |
|                        |        | q22.31       | 118,662,492        | 119,568,865       | 906,373             | loss        | -0.798          |
|                        |        | q22.31       | 119,813,145        | 119,956,690       | 143,545             | loss        | -0.533          |
|                        |        | q22.31       | 120,255,625        | 120,739,870       | 484,245             | loss        | -0.762          |
|                        |        | q24.2        | 144,853,764        | 145,284,493       | 430,729             | loss        | -0.798          |
|                        |        | q25.2-q25.3  | 155,196,611        | 156,955,441       | 1,758,830           | loss        | -0.787          |
|                        |        | q25.3        | 157,229,724        | 157,385,311       | 155,587             | loss        | -0.843          |
|                        | q25.3  | 157,978,533  | 159,322,914        | 1,344,381         | loss                | -0.815      |                 |
|                        | 8      | p22-q11.22   | 17,845,248         | 50,900,750        | 33,055,502          | loss        | -0.403          |
|                        |        | q12.2        | 61,775,605         | 62,024,900        | 249,295             | loss        | -0.866          |
|                        |        | q13.2-q13.3  | 70,241,591         | 73,352,788        | 3,111,197           | loss        | -0.356          |
|                        |        | q21.11       | 75,919,434         | 78,314,050        | 2,394,616           | loss        | -0.779          |
|                        |        | q21.13       | 81,329,964         | 81,634,113        | 304,149             | loss        | -0.890          |
|                        |        | q24.22       | 133,233,182        | 133,932,169       | 698,987             | loss        | -0.768          |
|                        | q24.22 | 134,107,093  | 135,555,510        | 1,448,417         | loss                | -0.799      |                 |
|                        | 11     | q22.2-q23.3  | 101,742,945        | 116,483,967       | 14,741,022          | loss        | -1.060          |
|                        | 13     | q14.12-q14.2 | 45,547,349         | 48,797,357        | 3,250,008           | loss        | -1.003          |
| q14.3                  |        | 49,259,211   | 51,108,269         | 1,849,058         | loss                | -1.060      |                 |



| ID                     | Chr.                  | Cytoband      | Segment Start [bp] | Segment Stop [bp] | Segment Length [bp] | Type of CNA | Mean Log2 Ratio |        |
|------------------------|-----------------------|---------------|--------------------|-------------------|---------------------|-------------|-----------------|--------|
| CLL073_post treatment  | 13                    | q14.3         | 51,345,450         | 51,361,599        | 16,149              | loss        | -1.040          |        |
|                        |                       | q14.3         | 98,757,773         | 99,056,191        | 298,418             | loss        | -0.775          |        |
|                        |                       | q32.3         | 99,140,591         | 99,250,769        | 110,178             | loss        | -0.900          |        |
|                        |                       | q32.3-qter    | 99,915,933         | 114,126,487       | 14,210,554          | loss        | -0.336          |        |
|                        | 15                    | q11.1-q22.31  | 18,276,354         | 64,341,484        | 46,065,130          | loss        | -0.337          |        |
|                        |                       | 17            | pter-p12           | 514               | 12,490,203          | 12,489,689  | loss            | -0.643 |
|                        |                       |               | p12-p11.2          | 12,493,589        | 22,046,797          | 9,553,208   | loss            | -0.279 |
| CLL074_first treatment | 10                    | q24.32-q24.33 | 103,792,359        | 105,374,982       | 1,582,623           | loss        | -1.161          |        |
|                        | 13                    | q14.2-q14.3   | 48,008,662         | 51,499,724        | 3,491,062           | loss        | -0.236          |        |
|                        | 16                    | p13.3         | 765                | 2,471,857         | 2,471,092           | loss        | -1.097          |        |
|                        |                       | pter-p13.1    | 514                | 7,554,433         | 7,553,919           | loss        | -1.053          |        |
|                        | 17                    | p13.1         | 8,340,364          | 8,524,173         | 183,809             | loss        | -1.041          |        |
|                        |                       | p13.1-p11.2   | 10,823,179         | 17,781,639        | 6,958,460           | loss        | -1.088          |        |
| CLL074_post treatment  | 10                    | q24.32-q24.33 | 103,792,359        | 105,374,982       | 1,582,623           | loss        | -0.772          |        |
|                        | 13                    | q14.2-q14.3   | 48,008,662         | 51,499,724        | 3,491,062           | loss        | -0.229          |        |
|                        | 16                    | p13.3         | 765                | 2,471,857         | 2,471,092           | loss        | -0.834          |        |
|                        |                       | pter-p13.1    | 514                | 7,554,433         | 7,553,919           | loss        | -0.815          |        |
|                        | 17                    | p13.1         | 8,340,364          | 8,524,173         | 183,809             | loss        | -0.756          |        |
|                        |                       | p13.1-p11.2   | 10,823,179         | 17,781,639        | 6,958,460           | loss        | -0.802          |        |
| CLL075_first treatment | 2                     | p16.1-p12     | 59,565,607         | 75,819,642        | 16,254,035          | gain        | 0.310           |        |
|                        |                       | p16.1-p15     | 60,256,522         | 63,104,662        | 2,848,140           | gain        | 0.622           |        |
|                        |                       | q13           | 111,149,065        | 112,828,328       | 1,679,263           | loss        | -1.037          |        |
|                        |                       | q24.3         | 165,284,220        | 166,919,690       | 1,635,470           | loss        | -0.382          |        |
|                        |                       | q31.1         | 171,468,528        | 172,046,546       | 578,018             | loss        | -0.464          |        |
|                        |                       | q31.1         | 176,248,649        | 176,824,870       | 576,221             | loss        | -0.426          |        |
|                        |                       | q31.2         | 178,272,554        | 180,127,517       | 1,854,963           | loss        | -0.417          |        |
|                        |                       | q31.3-q32.1   | 182,667,910        | 183,995,267       | 1,327,357           | loss        | -0.403          |        |
|                        |                       | q32.1-q32.2   | 185,551,105        | 189,536,072       | 3,984,967           | loss        | -0.359          |        |
|                        |                       | q33.1         | 200,288,763        | 201,948,900       | 1,660,137           | loss        | -0.498          |        |
|                        |                       | q33.2-q33.3   | 204,367,612        | 209,066,946       | 4,699,334           | loss        | -0.422          |        |
|                        |                       | q34           | 209,802,629        | 210,858,261       | 1,055,632           | loss        | -0.370          |        |
|                        | q36.1-q36.3           | 223,396,326   | 226,389,803        | 2,993,477         | loss                | -0.464      |                 |        |
|                        | 4                     | q21.21-q23    | 79,507,718         | 99,542,882        | 20,035,164          | loss        | -0.952          |        |
|                        |                       | q35.1-q35.2   | 186,943,598        | 191,261,892       | 4,318,294           | gain        | 0.412           |        |
|                        | 8                     | p12-p11.21    | 38,162,915         | 40,264,829        | 2,101,914           | loss        | -0.499          |        |
|                        |                       | q11.21        | 48,463,333         | 48,752,079        | 288,746             | loss        | -0.433          |        |
|                        |                       | q12.1-q12.3   | 58,390,944         | 64,602,899        | 6,211,955           | loss        | -0.397          |        |
|                        |                       | q13.3         | 70,645,032         | 72,011,812        | 1,366,780           | loss        | -0.410          |        |
|                        |                       | q21.11-q21.12 | 77,954,415         | 80,170,682        | 2,216,267           | loss        | -0.327          |        |
|                        | 11                    | pter-p15.4    | 188,510            | 6,919,741         | 6,731,231           | loss        | -0.973          |        |
|                        |                       | q14.3-qter    | 89,023,488         | 134,449,982       | 45,426,494          | loss        | -0.977          |        |
|                        | 12                    | q24.13        | 111,129,534        | 111,757,464       | 627,930             | gain        | 0.640           |        |
|                        | 13                    | q14.3         | 49,230,016         | 50,515,862        | 1,285,846           | loss        | -0.434          |        |
|                        | 16                    | q23.1         | 76,006,164         | 76,929,109        | 922,945             | loss        | -1.064          |        |
|                        | CLL075_post treatment | 2             | p16.1-p15          | 60,256,522        | 63,104,662          | 2,848,140   | gain            | 1.344  |
|                        |                       |               | q13                | 111,149,065       | 112,828,328         | 1,679,263   | loss            | -0.963 |
| 4                      |                       | q21.21-q23    | 79,507,718         | 99,542,882        | 20,035,164          | loss        | -1.050          |        |
|                        |                       | q35.1-q35.2   | 186,943,598        | 191,261,892       | 4,318,294           | gain        | 0.564           |        |
| 11                     |                       | pter-p15.4    | 188,510            | 6,919,741         | 6,731,231           | loss        | -1.012          |        |

| ID                     | Chr.         | Cytoband      | Segment Start [bp] | Segment Stop [bp] | Segment Length [bp] | Type of CNA | Mean Log2 Ratio |
|------------------------|--------------|---------------|--------------------|-------------------|---------------------|-------------|-----------------|
| CLL075_post treatment  | 11           | q14.3-qter    | 89,023,488         | 134,449,982       | 45,426,494          | loss        | -1.001          |
|                        | 12           | q24.13        | 111,129,534        | 111,757,464       | 627,930             | gain        | 0.694           |
|                        | 13           | q14.3         | 49,230,016         | 50,515,862        | 1,285,846           | loss        | -0.200          |
|                        | 16           | q23.1         | 76,006,164         | 76,929,109        | 922,945             | loss        | -1.029          |
| CLL076_first treatment | /            |               |                    |                   |                     |             |                 |
| CLL076_post treatment  | /            |               |                    |                   |                     |             |                 |
| CLL077_first treatment | 3            | q26.1-qter    | 162,008,939        | 199,380,503       | 37,371,564          | gain        | 0.546           |
|                        |              | p15.1-p14     | 6,128,739          | 8,895,250         | 2,766,511           | loss        | -0.871          |
|                        | 10           | p11.23-p11.22 | 29,936,984         | 32,807,329        | 2,870,345           | loss        | -0.912          |
|                        |              | p11.22        | 33,366,284         | 33,417,978        | 51,694              | loss        | -0.942          |
|                        | 13           | q14.11        | 39,555,961         | 41,985,332        | 2,429,371           | loss        | -0.757          |
|                        |              | q14.12-q14.2  | 45,653,853         | 46,362,137        | 708,284             | loss        | -0.768          |
|                        |              | q14.2         | 48,300,073         | 50,515,862        | 2,215,789           | loss        | -0.917          |
|                        |              | q14.2-q14.3   | 48,731,532         | 50,299,994        | 1,568,462           | loss        | -2.569          |
|                        | 17           | p13.3         | 1,626,752          | 2,406,800         | 780,048             | loss        | -0.822          |
| 19                     | p12          | 20,390,598    | 20,982,513         | 591,915           | loss                | -0.675      |                 |
| CLL077_post treatment  | 3            | q26.1-qter    | 162,008,939        | 199,380,503       | 37,371,564          | gain        | 0.658           |
|                        |              | p15.1-p14     | 6,128,739          | 8,895,250         | 2,766,511           | loss        | -1.235          |
|                        | 10           | p11.23-p11.22 | 29,936,984         | 32,807,329        | 2,870,345           | loss        | -1.123          |
|                        |              | p11.22        | 33,366,284         | 33,417,978        | 51,694              | loss        | -1.109          |
|                        | 13           | q14.11        | 39,555,961         | 41,985,332        | 2,429,371           | loss        | -1.127          |
|                        |              | q14.12-q14.2  | 45,653,853         | 46,362,137        | 708,284             | loss        | -1.073          |
|                        |              | q14.2         | 48,300,073         | 50,515,862        | 2,215,789           | loss        | -1.074          |
|                        |              | q14.2-q14.3   | 48,731,532         | 50,299,994        | 1,568,462           | loss        | -3.555          |
|                        | 17           | p13.3         | 1,626,752          | 2,406,800         | 780,048             | loss        | -1.177          |
| 19                     | p12          | 20,390,598    | 20,982,513         | 591,915           | loss                | -1.031      |                 |
| CLL078_first treatment | /            |               |                    |                   |                     |             |                 |
| CLL078_post treatment  | 13           | q14.11-q21.1  | 40,431,052         | 52,992,734        | 12,561,682          | loss        | -0.577          |
|                        |              | q21.1         | 55,410,510         | 56,433,536        | 1,023,026           | loss        | -0.612          |
|                        |              | q21.31        | 62,947,252         | 63,654,920        | 707,668             | loss        | -0.583          |
|                        |              | q22.1         | 73,351,523         | 73,702,574        | 351,051             | loss        | -0.416          |
|                        | 13           | q31.2         | 87,976,618         | 88,730,610        | 753,992             | loss        | -0.435          |
| CLL079_first treatment | 13           | q14.2-q14.3   | 48,088,127         | 50,418,407        | 2,330,280           | loss        | -0.424          |
| CLL079_post treatment  | 13           | q14.2-q14.3   | 48,088,127         | 50,418,407        | 2,330,280           | loss        | -1.051          |
| CLL080_first treatment | 13           | q14.3         | 49,532,667         | 50,359,721        | 827,054             | loss        | -0.200          |
| CLL080_post treatment  | 13           | q14.3         | 49,532,667         | 50,359,721        | 827,054             | loss        | -0.248          |
| CLL081_first treatment | 11           | q14.1-q23.2   | 83,347,956         | 114,703,906       | 31,355,950          | loss        | -0.956          |
| CLL081_post treatment  | 11           | q14.1-q23.2   | 83,347,956         | 114,703,906       | 31,355,950          | loss        | -0.893          |
| CLL082_first treatment | 2            | pter-p24.2    | 2,772              | 19,003,233        | 19,000,461          | loss        | -0.450          |
|                        |              | p22.3-p16.3   | 34,478,915         | 52,473,808        | 17,994,893          | loss        | -0.463          |
|                        |              | p16.1         | 55,632,699         | 58,397,402        | 2,764,703           | loss        | -0.410          |
|                        |              | p15           | 62,800,162         | 63,040,618        | 240,456             | loss        | -0.423          |
|                        |              | p14-p11.2     | 66,588,415         | 86,700,000        | 20,111,585          | loss        | -0.416          |
|                        | 4            | pter-p15.1    | 2,269              | 33,885,885        | 33,883,616          | loss        | -0.620          |
|                        | 17           | pter-p11.2    | 514                | 21,468,246        | 21,467,732          | loss        | -0.498          |
| 21                     | q22.11-q22.3 | 31,214,702    | 46,921,373         | 15,706,671        | gain                | 0.286       |                 |
| CLL082_post treatment  | 2            | pter-p24.2    | 2,772              | 19,003,233        | 19,000,461          | loss        | -0.794          |
|                        |              | p22.3-p16.3   | 34,478,915         | 52,473,808        | 17,994,893          | loss        | -0.815          |

| ID                     | Chr. | Cytoband      | Segment Start [bp] | Segment Stop [bp] | Segment Length [bp] | Type of CNA | Mean Log2 Ratio |
|------------------------|------|---------------|--------------------|-------------------|---------------------|-------------|-----------------|
| CLL082_post treatment  | 2    | p16.1         | 55,632,699         | 58,397,402        | 2,764,703           | loss        | -0.833          |
|                        |      | p15           | 62,800,162         | 63,040,618        | 240,456             | loss        | -0.855          |
|                        |      | p14-p11.2     | 66,588,415         | 86,700,000        | 20,111,585          | loss        | -0.805          |
|                        | 4    | pter-p15.1    | 2,269              | 33,885,885        | 33,883,616          | loss        | -0.831          |
|                        | 17   | pter-p11.2    | 514                | 21,468,246        | 21,467,732          | loss        | -0.770          |
|                        | 21   | q22.11-q22.3  | 31,214,702         | 46,921,373        | 15,706,671          | gain        | 0.560           |
| CLL083_first treatment | 12   | pter-qter     | 20,691             | 132,288,250       | 132,267,559         | gain        | 0.679           |
| CLL083_post treatment  | 12   | pter-qter     | 20,691             | 132,288,250       | 132,267,559         | gain        | 0.674           |
| CLL084_first treatment | 13   | q14.2-q14.3   | 47,458,000         | 51,037,114        | 3,579,114           | loss        | -0.967          |
| CLL084_post treatment  | 1    | q42.12-q42.13 | 223,759,292        | 225,115,793       | 1,356,501           | loss        | -0.501          |
|                        | 13   | q14.2-q14.3   | 47,458,000         | 51,037,114        | 3,579,114           | loss        | -0.913          |
| CLL085_first treatment | 6    | q14.1-q25.1   | 79,845,731         | 151,565,315       | 71,719,584          | loss        | -1.056          |
|                        | 11   | q22.3         | 107,389,600        | 107,838,550       | 448,950             | loss        | -1.115          |
| CLL085_post treatment  | 6    | q14.1-q25.1   | 79,845,731         | 151,565,315       | 71,719,584          | loss        | -0.881          |
|                        | 11   | q22.3         | 107,389,600        | 107,838,550       | 448,950             | loss        | -0.872          |
| CLL086_first treatment | 4    | pter-p15.1    | 2,269              | 28,059,604        | 28,057,335          | loss        | -0.334          |
|                        | 6    | q22.31        | 118,830,190        | 119,258,568       | 428,378             | gain        | 1.358           |
|                        | 21   | pter-qter     | 9,777,583          | 46,921,373        | 37,143,790          | gain        | 0.755           |
| CLL086_post treatment  | 4    | pter-p15.1    | 2,269              | 28,059,604        | 28,057,335          | loss        | -0.334          |
|                        | 6    | q22.31        | 118,830,190        | 119,258,568       | 428,378             | gain        | 1.190           |
|                        | 21   | pter-qter     | 9,777,583          | 46,921,373        | 37,143,790          | gain        | 0.606           |
| CLL087_first treatment | 11   | q13.5-q24.1   | 76,111,339         | 122,917,293       | 46,805,954          | loss        | -0.217          |
|                        |      | q14.1         | 77,113,479         | 83,457,074        | 6,343,595           | loss        | -0.348          |
|                        |      | q22.1-q23.2   | 99,122,339         | 114,331,961       | 15,209,622          | loss        | -0.316          |
|                        | 13   | q14.2-q14.3   | 48,494,258         | 50,085,576        | 1,591,318           | loss        | -0.251          |
| CLL087_post treatment  | 11   | q13.5-q24.1   | 76,111,339         | 122,917,293       | 46,805,954          | loss        | -0.448          |
|                        |      | q14.1         | 77,113,479         | 83,457,074        | 6,343,595           | loss        | -0.808          |
|                        |      | q22.1-q23.2   | 99,122,339         | 114,331,961       | 15,209,622          | loss        | -0.829          |
|                        | 13   | q14.2-q14.3   | 48,494,258         | 50,085,576        | 1,591,318           | loss        | -0.200          |
| CLL088_first treatment | 2    | pter-p15      | 2,772              | 63,156,703        | 63,153,931          | gain        | 0.622           |
|                        | 4    | pter-p15.1    | 56,707             | 29,688,795        | 29,632,088          | loss        | -0.462          |
|                        | 5    | q33.1-qter    | 147,920,897        | 180,722,927       | 32,802,030          | gain        | 0.461           |
|                        | 6    | q16.1-q27     | 95,481,487         | 167,371,516       | 71,890,029          | loss        | -0.187          |
|                        | 7    | pter-p21.1    | 52,899             | 15,837,963        | 15,785,064          | loss        | -0.864          |
|                        | 18   | q22.3-qter    | 67,590,053         | 76,116,029        | 8,525,976           | loss        | -0.641          |
| CLL088_post treatment  | 2    | pter-p15      | 2,772              | 63,156,703        | 63,153,931          | gain        | 0.333           |
|                        | 5    | q33.1-qter    | 147,920,897        | 180,722,927       | 32,802,030          | gain        | 0.219           |
|                        | 6    | q16.1-q27     | 95,481,487         | 167,371,516       | 71,890,029          | loss        | -0.292          |
|                        | 7    | pter-p21.1    | 52,899             | 15,837,963        | 15,785,064          | loss        | -0.379          |
|                        | 9    | p21.3         | 21,966,858         | 23,457,079        | 1,490,221           | loss        | -0.470          |
|                        | 18   | q22.3-qter    | 67,590,053         | 76,116,029        | 8,525,976           | loss        | -0.327          |
| CLL089_first treatment | 11   | q21-q24.3     | 95,388,671         | 128,030,238       | 32,641,567          | loss        | -1.019          |
|                        | 13   | q14.12-q14.3  | 45,676,791         | 50,631,049        | 4,954,258           | loss        | -1.106          |
|                        |      | q14.3         | 49,658,769         | 50,181,466        | 522,697             | loss        | -2.210          |
| CLL089_post treatment  | 2    | pter-p13.3    | 2,772              | 72,268,158        | 72,265,386          | gain        | 0.461           |
|                        | 4    | pter-p16.1    | 2,269              | 6,719,914         | 6,717,645           | loss        | -0.846          |
|                        | 5    | q14.3-qter    | 86,943,035         | 180,722,914       | 93,779,879          | gain        | 0.472           |
|                        | 11   | q21-q24.3     | 95,388,671         | 128,030,238       | 32,641,567          | loss        | -1.005          |

| ID                     | Chr.          | Cytoband      | Segment Start [bp] | Segment Stop [bp] | Segment Length [bp] | Type of CNA | Mean Log2 Ratio |
|------------------------|---------------|---------------|--------------------|-------------------|---------------------|-------------|-----------------|
| CLL089_post treatment  | 13            | q14.12-q14.3  | 45,676,791         | 50,631,049        | 4,954,258           | loss        | -1.055          |
|                        | 18            | pter-p11.21   | 1,543              | 11,108,494        | 11,106,951          | loss        | -0.614          |
|                        |               | p11.21        | 11,114,822         | 14,226,871        | 3,112,049           | gain        | 0.437           |
| CLL090_first treatment | 11            | q22.3-q23.3   | 104,490,185        | 115,992,909       | 11,502,724          | loss        | -1.141          |
|                        | 13            | q14.11-q21.1  | 42,913,460         | 53,902,449        | 10,988,989          | loss        | -0.200          |
| CLL090_post treatment  | 11            | q22.3-q23.3   | 104,490,185        | 115,992,909       | 11,502,724          | loss        | -0.923          |
|                        | 13            | q14.11-q21.1  | 42,913,460         | 53,902,449        | 10,988,989          | loss        | -0.220          |
| CLL091_first treatment | 3             | p26.3         | 35,333             | 2,250,040         | 2,214,707           | loss        | -0.659          |
|                        | 8             | p23.1-qter    | 111,436,336        | 146,268,947       | 34,832,611          | gain        | 0.500           |
| CLL091_post treatment  | 3             | p26.3         | 35,333             | 2,250,040         | 2,214,707           | loss        | -0.931          |
|                        | 8             | p23.1-qter    | 111,436,336        | 146,268,947       | 34,832,611          | gain        | 0.625           |
| CLL092_first treatment | 6             | p21.32        | 32,288,124         | 33,084,737        | 796,613             | loss        | -0.831          |
|                        | 13            | q14.12-q14.3  | 45,535,700         | 50,900,268        | 5,364,568           | loss        | -1.042          |
|                        |               | q21.31-q21.32 | 63,277,070         | 64,550,807        | 1,273,737           | loss        | -0.902          |
| 14                     | q31.3-q32.11  | 88,302,838    | 90,027,768         | 1,724,930         | loss                | -1.049      |                 |
| CLL092_post treatment  | 6             | p21.32        | 32,288,124         | 33,084,737        | 796,613             | loss        | -0.754          |
|                        | 13            | q14.12-q14.3  | 45,535,700         | 50,900,268        | 5,364,568           | loss        | -0.742          |
|                        |               | q21.31-q21.32 | 63,277,070         | 64,550,807        | 1,273,737           | loss        | -0.771          |
| 14                     | q31.3-q32.11  | 88,302,838    | 90,027,768         | 1,724,930         | loss                | -0.779      |                 |
| CLL093_first treatment | 6             | q11.1-q24.3   | 62,842,626         | 146,388,992       | 83,546,366          | loss        | -1.185          |
| CLL093_post treatment  | 6             | q11.1-q24.3   | 62,842,626         | 146,388,992       | 83,546,366          | loss        | -1.185          |
|                        | 8             | q24.13-q24.3  | 124,034,000        | 146,268,947       | 22,234,947          | gain        | 0.413           |
|                        | 10            | pter-p14      | 62,747             | 10,112,230        | 10,049,483          | loss        | -0.287          |
|                        |               | p13-p11.22    | 13,247,477         | 34,190,827        | 20,943,350          | loss        | -0.258          |
|                        | 13            | q31.1         | 83,169,767         | 83,427,928        | 258,161             | gain        | 0.423           |
|                        |               | q31.1-q31.2   | 84,629,259         | 87,789,182        | 3,159,923           | gain        | 0.499           |
|                        |               | q31.2         | 87,791,958         | 88,345,865        | 553,907             | gain        | 0.989           |
|                        | 17            | pter-p11.2    | 514                | 21,834,506        | 21,833,992          | loss        | -0.504          |
|                        |               | p11.2         | 21,834,615         | 22,037,528        | 202,913             | gain        | 0.302           |
| 18                     | p11.32-p11.23 | 221,508       | 8,468,169          | 8,246,661         | loss                | -0.414      |                 |
| CLL094_first treatment | 12            | pter-qter     | 20,691             | 132,288,250       | 132,267,559         | gain        | 0.544           |
| CLL094_post treatment  | 12            | pter-qter     | 20,691             | 132,288,250       | 132,267,559         | gain        | 0.499           |
| CLL095_first treatment | 1             | p36.11-p25.3  | 25,646,657         | 28,823,449        | 3,176,792           | loss        | -0.435          |
|                        | 3             | p26.3         | 1,178,416          | 1,900,097         | 721,681             | loss        | -0.461          |
|                        | 3             | p21.31        | 46,152,757         | 48,892,131        | 2,739,374           | loss        | -0.455          |
|                        | 11            | q14.1-q23.2   | 83,169,217         | 114,303,392       | 31,134,175          | loss        | -0.392          |
|                        | 13            | q14.3         | 49,502,618         | 50,161,858        | 659,240             | loss        | -0.396          |
| CLL095_post treatment  | 1             | p36.11-p25.3  | 25,646,657         | 28,823,449        | 3,176,792           | loss        | -0.621          |
|                        | 3             | p26.3         | 1,178,416          | 1,900,097         | 721,681             | loss        | -0.559          |
|                        |               | p21.31        | 46,152,757         | 48,892,131        | 2,739,374           | loss        | -0.568          |
|                        | 11            | q14.1-q23.2   | 83,169,217         | 114,303,392       | 31,134,175          | loss        | -0.570          |
| 13                     | q14.3         | 49,502,618    | 50,161,858         | 659,240           | loss                | -0.288      |                 |
| CLL096_first treatment | 13            | q14.3         | 49,421,659         | 50,367,799        | 946,140             | loss        | -2.094          |
| CLL096_post treatment  | 3             | p24.3-p24.2   | 16,938,923         | 23,976,082        | 7,037,159           | loss        | -0.232          |
|                        | 13            | q14.3         | 49,421,659         | 50,367,799        | 946,140             | loss        | -0.516          |
| CLL097_first treatment | 2             | p16.1-p15     | 58,139,058         | 62,432,681        | 4,293,623           | gain        | 0.705           |
|                        | 11            | q22.1-q23.3   | 101,562,306        | 116,362,838       | 14,800,532          | loss        | -1.081          |
|                        | 13            | q12.2         | 26,868,934         | 27,219,581        | 350,647             | loss        | -0.574          |

| ID                     | Chr. | Cytoband     | Segment Start [bp] | Segment Stop [bp] | Segment Length [bp] | Type of CNA | Mean Log2 Ratio |
|------------------------|------|--------------|--------------------|-------------------|---------------------|-------------|-----------------|
| CLL097_first treatment | 13   | q14.3        | 48,929,869         | 50,475,702        | 1,545,833           | loss        | -0.692          |
|                        | 18   | q23          | 75,252,935         | 75,427,447        | 174,512             | loss        | -0.748          |
| CLL097_post treatment  | 2    | p16.1-p15    | 58,139,058         | 62,432,681        | 4,293,623           | gain        | 0.413           |
|                        | 11   | q22.1-q23.3  | 101,562,306        | 116,362,838       | 14,800,532          | loss        | -0.762          |
|                        | 13   | q12.2        | 26,868,934         | 27,219,581        | 350,647             | loss        | -0.434          |
|                        |      | q14.3        | 48,929,869         | 50,475,702        | 1,545,833           | loss        | -0.574          |
| 18                     | q23  | 75,252,935   | 75,427,447         | 174,512           | loss                | -0.619      |                 |
| CLL098_first treatment | 11   | q21-q23.1    | 95,358,899         | 110,244,765       | 14,885,866          | loss        | -1.016          |
|                        | 13   | q14.2-q14.3  | 47,933,218         | 51,395,065        | 3,461,847           | loss        | -1.043          |
| CLL098_post treatment  | 11   | q21-q23.1    | 95,358,899         | 110,244,765       | 14,885,866          | loss        | -0.283          |
|                        | 13   | q14.2-q14.3  | 47,933,218         | 51,395,065        | 3,461,847           | loss        | -0.275          |
| CLL099_first treatment | 11   | q21-q23.2    | 95,683,286         | 113,814,530       | 18,131,244          | loss        | -0.592          |
|                        | 13   | q14.12-q14.3 | 45,798,922         | 50,592,326        | 4,793,404           | loss        | -0.638          |
| CLL099_post treatment  | 4    | q13.3-q22.3  | 70,549,400         | 97,512,125        | 26,962,725          | loss        | -0.621          |
|                        | 11   | q21-q23.3    | 95,636,878         | 116,441,939       | 20,805,061          | loss        | -0.512          |
|                        |      | q21-q23.2    | 95,683,286         | 113,814,530       | 18,131,244          | loss        | -0.874          |
|                        | 13   | q14.12-q14.3 | 45,798,922         | 50,592,326        | 4,793,404           | loss        | -0.831          |
| CLL100_first treatment | /    |              |                    |                   |                     |             |                 |
| CLL100_post treatment  | 17   | p13.3-p13.1  | 1,127,395          | 7,501,560         | 6,374,165           | loss        | -0.247          |
|                        |      | q25.1-q25.2  | 71,105,010         | 72,336,396        | 1,231,386           | loss        | -0.229          |
| CLL101_first treatment | 5    | q32          | 146,149,340        | 146,790,575       | 641,235             | gain        | 0.770           |
|                        | 12   | pter-qter    | 20,691             | 132,288,250       | 132,267,559         | gain        | 0.648           |
|                        | 15   | q26.3        | 99,584,813         | 99,926,399        | 341,586             | gain        | 0.807           |
|                        | 22   | q11.21       | 16,456,523         | 17,030,682        | 574,159             | gain        | 0.809           |
| CLL101_post treatment  | 5    | q32          | 146,149,340        | 146,790,575       | 641,235             | gain        | 0.759           |
|                        | 12   | pter-qter    | 20,691             | 132,288,250       | 132,267,559         | gain        | 0.693           |
|                        | 15   | q26.3        | 99,584,813         | 99,926,399        | 341,586             | gain        | 0.817           |
|                        | 22   | q11.21       | 16,456,523         | 17,030,682        | 574,159             | gain        | 0.788           |
| CLL102_first treatment | 2    | pter-p14     | 2,772              | 65,473,284        | 65,470,512          | gain        | 0.704           |
|                        | 11   | q21-q24.3    | 93,006,972         | 127,982,682       | 34,975,710          | loss        | -0.897          |
|                        | 13   | q14.3        | 48,988,410         | 50,400,939        | 1,412,529           | loss        | -0.819          |
| CLL102_post treatment  | 2    | pter-p14     | 2,772              | 65,473,284        | 65,470,512          | gain        | 0.749           |
|                        | 11   | q21-q24.3    | 93,006,972         | 127,982,682       | 34,975,710          | loss        | -0.971          |
|                        | 13   | q14.3        | 48,988,410         | 50,400,939        | 1,412,529           | loss        | -0.913          |
| CLL103_first treatment | 2    | pter-p13     | 2,772              | 66,146,505        | 66,143,733          | gain        | 0.353           |
|                        | 4    | pter-p15.31  | 55,749             | 18,644,784        | 18,589,035          | loss        | -0.593          |
| CLL103_post treatment  | 2    | pter-p14     | 2,772              | 66,146,505        | 66,143,733          | gain        | 0.703           |
|                        | 4    | pter-p15.31  | 55,749             | 18,644,784        | 18,589,035          | loss        | -1.056          |

### Supplementary Table S3:

Acquired copy-neutral loss of heterozygosity (CN-LOH) within the sequential samples of 103 analyzed cases. CN-LOHs are listed by providing start and stop positions referring to the UCSC Genome Browser; assembly March 2006, NCBI36/hg18 (<http://www.genome.ucsc.edu/>).

| SNP-ID | Chr. | Cytoband     | SNP Start Position | SNP Stop Position | Segment Start [Mb] | Segment Stop [Mb] |
|--------|------|--------------|--------------------|-------------------|--------------------|-------------------|
| CLL101 | 1    | pter - p13.2 | SNP_A-8420886      | SNP_A-8448168     | 1,038,818          | 112,729,435       |
| CLL047 | 9    | pter - p11.2 | SNP_A-8451753      | SNP_A-4228947     | 36,587             | 43,493,496        |
| CLL042 | 13   | q14.3 - qter | SNP_A-8462887      | SNP_A-8315664     | 50,814,168         | 114,082,644       |
| CLL029 | 18   | q23 - qter   | SNP_A-8583673      | SNP_A-2234800     | 72,157,588         | 76,115,554        |
| CLL042 | 18   | q11.2 - qter | SNP_A-8299818      | SNP_A-2234800     | 17,407,492         | 76,115,554        |
| CLL102 | 18   | q12.2 - qter | SNP_A-4268865      | SNP_A-4302082     | 31,541,458         | 76,069,383        |

**Supplementary Table S4:**

Frequency of cytogenetic risk markers in the FC treated patient group and the FCR treated patient group.

|                                       | <b>FC treated patients<br/>(N=46)</b> |     | <b>FCR treated patients<br/>(N=40)</b> |        |
|---------------------------------------|---------------------------------------|-----|----------------------------------------|--------|
| <b><i>IgHV</i> mutated</b>            | N=12                                  | 26% | N=9                                    | 22.50% |
| <b><i>IgHV</i> unmutated</b>          | N=32                                  | 70% | N=31                                   | 77.50% |
| <b><i>IgHV</i> unknown</b>            | N=2                                   | 4%  | /                                      | /      |
| <b>Del(17p)</b>                       | N=2                                   | 4%  | N=5                                    | 12.50% |
| <b><i>TP53</i>mut</b>                 | N=7                                   | 15% | N=6                                    | 15%    |
| <b>Del(17p) and/or <i>TP53</i>mut</b> | N=8                                   | 17% | N=6                                    | 15%    |
| <b>Del(11q)</b>                       | N=17                                  | 37% | N=17                                   | 42.50% |
| <b>Del(13q) as sole abnormality</b>   | N=7                                   | 15% | N=7                                    | 17.50% |
| <b>Normal Karyotype</b>               | N=7                                   | 15% | N=6                                    | 15%    |

### Supplementary Table S5:

Minimal residual disease (MRD) levels measured at interim response assessment (after three cycles of therapy, N=52/86), at initial response assessment (one month after the last treatment cycle, N=41/86) and at final response assessment (three months after the third treatment cycle, N=59/86). MRD levels are reported as fraction of CLL cells of all nucleated cells.

| SNP-ID | MRD Interim Response Assessment | MRD Initial Response Assessment | MRD Final Response Assessment | MRD Negativity |
|--------|---------------------------------|---------------------------------|-------------------------------|----------------|
| CLL018 | 0.000361                        | n.a.                            | n.a.                          | n.a.           |
| CLL019 | n.a.                            | n.a.                            | <0.0001                       | yes            |
| CLL020 | n.a.                            | n.a.                            | 0.002374                      | no             |
| CLL021 | 0.046004                        | n.a.                            | 0.006642                      | no             |
| CLL022 | 0.036990                        | 0.038335                        | 0.031105                      | no             |
| CLL023 | n.a.                            | n.a.                            | n.a.                          | n.a.           |
| CLL024 | 0.004653                        | 0.000596                        | 0.000305                      | no             |
| CLL025 | 0.041805                        | 0.020647                        | 0.042569                      | no             |
| CLL026 | 0.035683                        | n.a.                            | n.a.                          | n.a.           |
| CLL027 | 0.270287                        | n.a.                            | n.a.                          | n.a.           |
| CLL028 | 0.014007                        | n.a.                            | n.a.                          | n.a.           |
| CLL029 | 0.689911                        | 0.524507                        | 0.554558                      | no             |
| CLL030 | 0.466924                        | 0.347536                        | 0.412751                      | no             |
| CLL031 | 0.050804                        | n.a.                            | 0.029144                      | no             |
| CLL032 | <0.0001                         | n.a.                            | <0.0001                       | yes            |
| CLL033 | 0.006653                        | 0.000045                        | 0.000030                      | yes            |
| CLL034 | n.a.                            | <0.0001                         | <0.0001                       | yes            |
| CLL035 | 0.103020                        | 0.086546                        | 0.141167                      | no             |
| CLL036 | 0.041082                        | 0.012020                        | 0.043486                      | no             |
| CLL037 | 0.007325                        | n.a.                            | 0.000517                      | no             |
| CLL038 | n.a.                            | n.a.                            | n.a.                          | n.a.           |
| CLL039 | n.a.                            | <0.0001                         | <0.0001                       | yes            |
| CLL040 | n.a.                            | n.a.                            | n.a.                          | n.a.           |
| CLL041 | 0.342997                        | 0.076322                        | 0.225996                      | no             |
| CLL042 | 0.000099                        | n.a.                            | n.a.                          | yes            |
| CLL043 | 0.000672                        | <0.0001                         | <0.0001                       | yes            |
| CLL044 | 0.001654                        | 0.000066                        | 0.000034                      | yes            |
| CLL045 | 0.005839                        | 0.001497                        | 0.000858                      | no             |
| CLL046 | n.a.                            | 0.000356                        | 0.000304                      | no             |
| CLL047 | n.a.                            | n.a.                            | n.a.                          | n.a.           |
| CLL048 | n.a.                            | n.a.                            | 0.002126                      | no             |
| CLL049 | 0.140914                        | n.a.                            | <0.0001                       | yes            |
| CLL050 | n.a.                            | n.a.                            | 0.001006                      | no             |
| CLL051 | <0.0001                         | n.a.                            | n.a.                          | yes            |
| CLL052 | n.a.                            | n.a.                            | n.a.                          | n.a.           |



| SNP-ID | MRD Interim Response Assessment | MRD Initial Response Assessment | MRD Final Response Assessment | MRD Negativity |
|--------|---------------------------------|---------------------------------|-------------------------------|----------------|
| CLL053 | 0.001522                        | 0.000239                        | 0.000763                      | no             |
| CLL054 | n.a.                            | <0.0001                         | <0.0001                       | yes            |
| CLL055 | n.a.                            | <0.0001                         | <0.0001                       | yes            |
| CLL056 | 0.013517                        | 0.002159                        | n.a.                          | n.a.           |
| CLL057 | 0.007913                        | 0.000071                        | n.a.                          | yes            |
| CLL058 | 0.000113                        | <0.0001                         | n.a.                          | yes            |
| CLL059 | 0.038737                        | 0.002840                        | n.a.                          | n.a.           |
| CLL060 | n.a.                            | 0.665600                        | n.a.                          | n.a.           |
| CLL061 | n.a.                            | 0.000680                        | 0.000155                      | no             |
| CLL062 | 0.002094                        | <0.0001                         | <0.0001                       | yes            |
| CLL063 | 0.000602                        | n.a.                            | <0.0001                       | yes            |
| CLL064 | n.a.                            | 0.039381                        | n.a.                          | n.a.           |
| CLL065 | n.a.                            | 0.022260                        | 0.038365                      | no             |
| CLL066 | 0.017497                        | 0.000417                        | 0.001112                      | no             |
| CLL067 | n.a.                            | n.a.                            | 0.096316                      | no             |
| CLL068 | n.a.                            | n.a.                            | <0.0001                       | yes            |
| CLL069 | 0.082293                        | n.a.                            | 0.220647                      | no             |
| CLL070 | 0.000844                        | 0.000041                        | 0.000077                      | yes            |
| CLL071 | n.a.                            | n.a.                            | 0.016308                      | no             |
| CLL072 | 0.063528                        | 0.010216                        | 0.013766                      | no             |
| CLL073 | 0.074100                        | n.a.                            | 0.004751                      | no             |
| CLL074 | n.a.                            | n.a.                            | 0.093507                      | no             |
| CLL075 | 0.012443                        | n.a.                            | n.a.                          | n.a.           |
| CLL076 | n.a.                            | n.a.                            | n.a.                          | n.a.           |
| CLL077 | 0.281683                        | n.a.                            | 0.138981                      | no             |
| CLL078 | 0.013818                        | 0.000136                        | 0.000174                      | no             |
| CLL079 | 0.002436                        | n.a.                            | <0.0001                       | yes            |
| CLL080 | 0.116849                        | n.a.                            | 0.002795                      | no             |
| CLL081 | 0.005495                        | <0.0001                         | <0.0001                       | yes            |
| CLL082 | 0.342743                        | 0.451436                        | 0.715403                      | no             |
| CLL083 | n.a.                            | n.a.                            | n.a.                          | n.a.           |
| CLL084 | 0.021575                        | 0.007903                        | 0.042741                      | no             |
| CLL085 | n.a.                            | 0.864112                        | n.a.                          | n.a.           |
| CLL086 | 0.005884                        | 0.000416                        | 0.001114                      | no             |
| CLL087 | n.a.                            | n.a.                            | <0.0001                       | yes            |
| CLL088 | 0.000144                        | n.a.                            | n.a.                          | n.a.           |
| CLL089 | 0.003949                        | 0.000249                        | 0.000524                      | no             |
| CLL090 | 0.060645                        | 0.015083                        | 0.022648                      | no             |
| CLL091 | n.a.                            | n.a.                            | n.a.                          | n.a.           |
| CLL092 | n.a.                            | n.a.                            | 0.025638                      | no             |
| CLL093 | n.a.                            | n.a.                            | n.a.                          | n.a.           |
| CLL094 | 0.003041                        | <0.0001                         | n.a.                          | yes            |
| CLL095 | n.a.                            | n.a.                            | <0.0001                       | yes            |
| CLL096 | 0.005232                        | <0.0001                         | 0.000042                      | yes            |
| CLL097 | n.a.                            | n.a.                            | 0.000393                      | no             |

| <b>SNP-ID</b> | <b>MRD Interim Response Assessment</b> | <b>MRD Initial Response Assessment</b> | <b>MRD Final Response Assessment</b> | <b>MRD Negativity</b> |
|---------------|----------------------------------------|----------------------------------------|--------------------------------------|-----------------------|
| CLL098        | n.a.                                   | n.a.                                   | n.a.                                 | n.a.                  |
| CLL099        | n.a.                                   | n.a.                                   | n.a.                                 | n.a.                  |
| CLL100        | 0.000268                               | n.a.                                   | <0.0001                              | yes                   |
| CLL101        | 0.012642                               | n.a.                                   | 0.000499                             | no                    |
| CLL102        | n.a.                                   | n.a.                                   | <0.0001                              | yes                   |
| CLL103        | 0.002769                               | 0.000145                               | 0.000375                             | no                    |

### Supplementary Table S6:

Observed mutations in *TP53* and *ATM* (all coding exons) for each case within the sequential samples of 103 analyzed cases.

| Sample ID              | Platform    | <i>ATM</i> Mutation | <i>ATM</i> Mutation<br>(Variant Fraction) | <i>TP53</i> Mutation | <i>TP53</i> Mutation<br>(Variant Fraction) |
|------------------------|-------------|---------------------|-------------------------------------------|----------------------|--------------------------------------------|
| CLL001_pre-treatment   | MiSeq       | -                   | -                                         | -                    | -                                          |
| CLL001_first treatment | MiSeq & WES | -                   | -                                         | -                    | -                                          |
| CLL002_pre-treatment   | MiSeq       | -                   | -                                         | -                    | -                                          |
| CLL002_first treatment | WES         | -                   | -                                         | -                    | -                                          |
| CLL003_pre-treatment   | MiSeq       | -                   | -                                         | -                    | -                                          |
| CLL003_first treatment | MiSeq       | -                   | -                                         | -                    | -                                          |
| CLL004_pre-treatment   | MiSeq       | -                   | -                                         | -                    | -                                          |
| CLL004_first treatment | WES         | -                   | -                                         | -                    | -                                          |
| CLL005_pre-treatment   | MiSeq       | K820R               | 0.08                                      | -                    | -                                          |
| CLL005_first treatment | WES         | K820R               | 0.04                                      | -                    | -                                          |
| CLL006_pre-treatment   | MiSeq       | -                   | -                                         | -                    | -                                          |
| CLL006_first treatment | MiSeq       | -                   | -                                         | -                    | -                                          |
| CLL007_pre-treatment   | MiSeq       | -                   | -                                         | -                    | -                                          |
| CLL007_first treatment | MiSeq       | -                   | -                                         | -                    | -                                          |
| CLL008_pre-treatment   | MiSeq       | -                   | -                                         | -                    | -                                          |
| CLL008_first treatment | MiSeq       | -                   | -                                         | -                    | -                                          |
| CLL009_pre-treatment   | MiSeq       | -                   | -                                         | -                    | -                                          |
| CLL009_first treatment | MiSeq       | -                   | -                                         | -                    | -                                          |
| CLL010_pre-treatment   | WES         | -                   | -                                         | -                    | -                                          |
| CLL010_first treatment | MiSeq       | -                   | -                                         | -                    | -                                          |
| CLL011_pre-treatment   | MiSeq       | -                   | -                                         | -                    | -                                          |
| CLL011_first treatment | MiSeq       | -                   | -                                         | -                    | -                                          |
| CLL012_pre-treatment   | MiSeq       | -                   | -                                         | E258K                | 0.666                                      |
| CLL012_first treatment | MiSeq       | -                   | -                                         | E258K                | 0.955                                      |
| CLL013_pre-treatment   | MiSeq       | Y2019C              | 0.344                                     | -                    | -                                          |
| CLL013_first treatment | MiSeq       | Y2019C              | 0.05                                      | -                    | -                                          |

| Sample ID              | Platform    | ATM Mutation      | ATM Mutation<br>(Variant Fraction) | TP53 Mutation | TP53 Mutation<br>(Variant Fraction) |
|------------------------|-------------|-------------------|------------------------------------|---------------|-------------------------------------|
| CLL014_pre-treatment   | MiSeq       | -                 | -                                  | -             | -                                   |
| CLL014_first treatment | MiSeq       | -                 | -                                  | -             | -                                   |
| CLL015_pre-treatment   | MiSeq       | -                 | -                                  | -             | -                                   |
| CLL015_first treatment | MiSeq       | -                 | -                                  | -             | -                                   |
| CLL016_pre-treatment   | MiSeq       | -                 | -                                  | -             | -                                   |
| CLL016_first treatment | MiSeq       | -                 | -                                  | -             | -                                   |
| CLL017_pre-treatment   | MiSeq       | -                 | -                                  | K132Q         | 0.139                               |
| CLL017_first treatment | MiSeq       | -                 | -                                  | K132Q         | 0.229                               |
| CLL018_pre-treatment   | MiSeq       | I2888T            | 0.462                              | -             | -                                   |
| CLL018_first treatment | MiSeq       | I2888T            | 0.54                               | -             | -                                   |
| CLL018_post treatment  | MiSeq       | M3011K            | 0.445                              | -             | -                                   |
| CLL019_pre-treatment   | MiSeq       | E1091fs           | 0.023                              | -             | -                                   |
| CLL019_first treatment | MiSeq       | E1091fs // E2164K | 0.253 // 0.418                     | -             | -                                   |
| CLL019_post treatment  | MiSeq       | E1091fs           | 0.25                               | -             | -                                   |
| CLL020_pre-treatment   | MiSeq       | -                 | -                                  | -             | -                                   |
| CLL020_first treatment | WES         | -                 | -                                  | -             | -                                   |
| CLL020_post treatment  | MiSeq       | -                 | -                                  | -             | -                                   |
| CLL021_pre-treatment   | MiSeq       | -                 | -                                  | -             | -                                   |
| CLL021_first treatment | MiSeq & WES | -                 | -                                  | -             | -                                   |
| CLL021_post treatment  | WES         | -                 | -                                  | -             | -                                   |
| CLL022_pre-treatment   | MiSeq       | -                 | -                                  | L111fs        | 0.712                               |
| CLL022_first treatment | WES         | -                 | -                                  | L111fs        | 1                                   |
| CLL022_post treatment  | WES         | -                 | -                                  | L111fs        | 0.466                               |
| CLL023_pre-treatment   | MiSeq       | -                 | -                                  | A138V         | 0.117                               |
| CLL023_first treatment | MiSeq       | -                 | -                                  | A138V         | 0.085                               |
| CLL023_post treatment  | MiSeq       | -                 | -                                  | A138V         | 0.878                               |
| CLL024_pre-treatment   | MiSeq       | -                 | -                                  | -             | -                                   |
| CLL024_first treatment | MiSeq       | -                 | -                                  | -             | -                                   |
| CLL024_post treatment  | MiSeq       | -                 | -                                  | -             | -                                   |

| Sample ID              | Platform    | ATM Mutation    | ATM Mutation<br>(Variant Fraction) | TP53 Mutation        | TP53 Mutation<br>(Variant Fraction) |
|------------------------|-------------|-----------------|------------------------------------|----------------------|-------------------------------------|
| CLL025_pre-treatment   | MiSeq       | -               | -                                  | -                    | -                                   |
| CLL025_first treatment | MiSeq       | -               | -                                  | -                    | -                                   |
| CLL025_post treatment  | MiSeq & WES | -               | -                                  | -                    | -                                   |
| CLL026_pre-treatment   | MiSeq       | T1953I          | 0.707                              | -                    | -                                   |
| CLL026_first treatment | MiSeq       | T1953I          | 0.399                              | -                    | -                                   |
| CLL026_post treatment  | MiSeq       | -               | -                                  | -                    | -                                   |
| CLL027_pre-treatment   | MiSeq       | -               | -                                  | -                    | -                                   |
| CLL027_first treatment | MiSeq       | -               | -                                  | splice site          | 0.01                                |
| CLL027_post treatment  | MiSeq       | -               | -                                  | R337C // splice site | 0.087 // 0.735                      |
| CLL028_first treatment | WES         | T761fs          | 0.332                              | -                    | -                                   |
| CLL028_post treatment  | MiSeq & WES | S707P // T761fs | 0.820 // 0.784                     | -                    | -                                   |
| CLL029_first treatment | MiSeq & WES | -               | -                                  | G245D                | 0.439                               |
| CLL029_post treatment  | MiSeq & WES | -               | -                                  | G245D                | 0.565                               |
| CLL030_first treatment | WES         | -               | -                                  | D281N                | 0.756                               |
| CLL030_post treatment  | MiSeq & WES | -               | -                                  | D281N                | 0.546                               |
| CLL031_first treatment | MiSeq & WES | -               | -                                  | D281G // R280G       | 0.292 // 0.469                      |
| CLL031_post treatment  | WES         | -               | -                                  | D281G // R280G       | 0.079 // 0.292                      |
| CLL032_first treatment | WES         | -               | -                                  | -                    | -                                   |
| CLL032_post treatment  | MiSeq & WES | -               | -                                  | -                    | -                                   |
| CLL033_first treatment | WES         | -               | -                                  | -                    | -                                   |
| CLL033_post treatment  | MiSeq & WES | -               | -                                  | -                    | -                                   |
| CLL034_first treatment | WES         | -               | -                                  | -                    | -                                   |
| CLL034_post treatment  | MiSeq & WES | -               | -                                  | -                    | -                                   |
| CLL035_first treatment | MiSeq & WES | -               | -                                  | R158L                | 0.073                               |
| CLL035_post treatment  | MiSeq & WES | -               | -                                  | R248Q // R158L       | 0.111 // 0.744                      |
| CLL036_first treatment | MiSeq       | -               | -                                  | -                    | -                                   |
| CLL036_post treatment  | MiSeq       | -               | -                                  | -                    | -                                   |
| CLL037_first treatment | MiSeq       | -               | -                                  | -                    | -                                   |
| CLL037_post treatment  | MiSeq       | -               | -                                  | P152L                | 0.12                                |

| Sample ID              | Platform    | ATM Mutation | ATM Mutation<br>(Variant Fraction) | TP53 Mutation | TP53 Mutation<br>(Variant Fraction) |
|------------------------|-------------|--------------|------------------------------------|---------------|-------------------------------------|
| CLL038_first treatment | MiSeq       | -            | -                                  | -             | -                                   |
| CLL038_post treatment  | MiSeq       | -            | -                                  | -             | -                                   |
| CLL039_first treatment | MiSeq & WES | -            | -                                  | -             | -                                   |
| CLL039_post treatment  | MiSeq       | splice site  | 0.15                               | -             | -                                   |
| CLL040_first treatment | MiSeq & WES | -            | -                                  | -             | -                                   |
| CLL040_post treatment  | MiSeq & WES | -            | -                                  | -             | -                                   |
| CLL041_first treatment | MiSeq       | -            | -                                  | -             | -                                   |
| CLL041_post treatment  | MiSeq       | -            | -                                  | -             | -                                   |
| CLL042_first treatment | WES         | -            | -                                  | -             | -                                   |
| CLL042_post treatment  | MiSeq & WES | -            | -                                  | V157F         | 0.379                               |
| CLL043_first treatment | WES         | -            | -                                  | -             | -                                   |
| CLL043_post treatment  | MiSeq & WES | -            | -                                  | -             | -                                   |
| CLL044_first treatment | WES         | -            | -                                  | -             | -                                   |
| CLL044_post treatment  | MiSeq & WES | -            | -                                  | -             | -                                   |
| CLL045_first treatment | MiSeq       | -            | -                                  | splice site   | 0.532                               |
| CLL045_post treatment  | MiSeq       | -            | -                                  | splice site   | 0.511                               |
| CLL046_first treatment | WES         | -            | -                                  | -             | -                                   |
| CLL046_post treatment  | MiSeq & WES | -            | -                                  | -             | -                                   |
| CLL047_first treatment | WES         | -            | -                                  | -             | -                                   |
| CLL047_post treatment  | MiSeq & WES | -            | -                                  | -             | -                                   |
| CLL048_first treatment | WES         | -            | -                                  | -             | -                                   |
| CLL048_post treatment  | MiSeq & WES | -            | -                                  | -             | -                                   |
| CLL049_first treatment | WES         | -            | -                                  | -             | -                                   |
| CLL049_post treatment  | MiSeq       | -            | -                                  | H179Y         | 0.145                               |
| CLL050_first treatment | WES         | -            | -                                  | -             | -                                   |
| CLL050_post treatment  | MiSeq       | -            | -                                  | -             | -                                   |
| CLL051_first treatment | WES         | -            | -                                  | -             | -                                   |
| CLL051_post treatment  | WES         | -            | -                                  | -             | -                                   |
| CLL052_first treatment | WES         | -            | -                                  | -             | -                                   |
| CLL052_post treatment  | MiSeq       | -            | -                                  | -             | -                                   |

| Sample ID              | Platform    | ATM Mutation                                                      | ATM Mutation<br>(Variant Fraction)                         | TP53 Mutation  | TP53 Mutation<br>(Variant Fraction) |
|------------------------|-------------|-------------------------------------------------------------------|------------------------------------------------------------|----------------|-------------------------------------|
| CLL053_first treatment | WES         | -                                                                 | -                                                          | -              | -                                   |
| CLL053_post treatment  | WES         | -                                                                 | -                                                          | T123fs         | 0.386                               |
| CLL054_first treatment | WES         | L2890P                                                            | 0.308                                                      | -              | -                                   |
| CLL054_post treatment  | MiSeq & WES | -                                                                 | -                                                          | W53*           | 0.66                                |
| CLL055_first treatment | WES         | -                                                                 | -                                                          | -              | -                                   |
| CLL055_post treatment  | MiSeq       | M2936fs                                                           | 0.683                                                      | -              | -                                   |
| CLL056_first treatment | WES         | -                                                                 | -                                                          | -              | -                                   |
| CLL056_post treatment  | MiSeq       | -                                                                 | -                                                          | -              | -                                   |
| CLL057_first treatment | MiSeq       | -                                                                 | -                                                          | -              | -                                   |
| CLL057_post treatment  | MiSeq       | -                                                                 | -                                                          | -              | -                                   |
| CLL058_first treatment | MiSeq & WES | L481fs                                                            | 0.09                                                       | -              | -                                   |
| CLL058_post treatment  | MiSeq & WES | L481fs                                                            | 0.066                                                      | -              | -                                   |
| CLL059_first treatment | WES         | g.chr11:108121499T>C,<br>g.chr11:108216546G>T                     | 0.393 // 0.343                                             | -              | -                                   |
| CLL059_post treatment  | MiSeq & WES | L436P                                                             | 0.16                                                       | -              | -                                   |
| CLL060_first treatment | WES         | -                                                                 | -                                                          | -              | -                                   |
| CLL060_post treatment  | WES         | E390K // I678N // E688K // Q700K //<br>H1474N // Y1475* // C2286F | 0.093 // 0.119 // 0.143 // 0.143 //<br>0.2 // 0.2 // 0.374 | R290H // R110C | 0.562 // 0.14                       |
| CLL061_first treatment | WES         | -                                                                 | -                                                          | -              | -                                   |
| CLL061_post treatment  | MiSeq & WES | -                                                                 | -                                                          | -              | -                                   |
| CLL062_first treatment | WES         | -                                                                 | -                                                          | -              | -                                   |
| CLL062_post treatment  | MiSeq & WES | -                                                                 | -                                                          | -              | -                                   |
| CLL063_first treatment | WES         | -                                                                 | -                                                          | -              | -                                   |
| CLL063_post treatment  | MiSeq & WES | -                                                                 | -                                                          | R209fs*7       | 0.61                                |
| CLL064_first treatment | MiSeq & WES | F492fs // splice site                                             | 0.353 // 0.479                                             | H193R          | 0.089                               |
| CLL064_post treatment  | WES         | F492fs // splice site                                             | 0.403 // 0.362                                             | H193R          | 0.238                               |
| CLL065_first treatment | MiSeq       | -                                                                 | -                                                          | -              | -                                   |
| CLL065_post treatment  | MiSeq       | -                                                                 | -                                                          | -              | -                                   |
| CLL066_first treatment | WES         | -                                                                 | -                                                          | -              | -                                   |
| CLL066_post treatment  | MiSeq & WES | -                                                                 | -                                                          | -              | -                                   |

| Sample ID              | Platform    | ATM Mutation          | ATM Mutation<br>(Variant Fraction) | TP53 Mutation     | TP53 Mutation<br>(Variant Fraction) |
|------------------------|-------------|-----------------------|------------------------------------|-------------------|-------------------------------------|
| CLL067_first treatment | MiSeq       | -                     | -                                  | -                 | -                                   |
| CLL067_post treatment  | MiSeq       | -                     | -                                  | -                 | -                                   |
| CLL068_first treatment | WES         | -                     | -                                  | -                 | -                                   |
| CLL068_post treatment  | MiSeq & WES | -                     | -                                  | V157F             | 0.569                               |
| CLL069_first treatment | MiSeq       | -                     | -                                  | -                 | -                                   |
| CLL069_post treatment  | MiSeq       | -                     | -                                  | -                 | -                                   |
| CLL070_first treatment | MiSeq       | -                     | -                                  | -                 | -                                   |
| CLL070_post treatment  | MiSeq       | -                     | -                                  | R306*             | 0.322                               |
| CLL071_first treatment | MiSeq       | -                     | -                                  | C135Y             | 0.159                               |
| CLL071_post treatment  | MiSeq       | -                     | -                                  | C135Y             | 0.427                               |
| CLL072_first treatment | MiSeq       | -                     | -                                  | -                 | -                                   |
| CLL072_post treatment  | MiSeq & WES | -                     | -                                  | -                 | -                                   |
| CLL073_first treatment | WES         | -                     | -                                  | -                 | -                                   |
| CLL073_post treatment  | MiSeq & WES | -                     | -                                  | C141F // A276P    | 0.13 // 0.21                        |
| CLL074_first treatment | MiSeq       | -                     | -                                  | L194R             | 0.996                               |
| CLL074_post treatment  | MiSeq       | -                     | -                                  | L194R             | 0.931                               |
| CLL075_first treatment | WES         | R1875* // splice site | 0.426 // 0.929                     | -                 | -                                   |
| CLL075_post treatment  | MiSeq & WES | R1875*// splice site  | 0.926 // 0.974                     | -                 | -                                   |
| CLL076_first treatment | MiSeq       | -                     | -                                  | -                 | -                                   |
| CLL076_post treatment  | MiSeq       | -                     | -                                  | G154fs // P153del | 0.499 // 0.367                      |
| CLL077_first treatment | MiSeq       | -                     | -                                  | H193Y             | 0.536                               |
| CLL077_post treatment  | MiSeq       | -                     | -                                  | H193Y             | 0.513                               |
| CLL078_first treatment | MiSeq       | -                     | -                                  | -                 | -                                   |
| CLL078_post treatment  | MiSeq & WES | -                     | -                                  | -                 | -                                   |
| CLL079_first treatment | MiSeq       | -                     | -                                  | -                 | -                                   |
| CLL079_post treatment  | MiSeq & WES | -                     | -                                  | -                 | -                                   |
| CLL080_first treatment | MiSeq       | -                     | -                                  | -                 | -                                   |
| CLL080_post treatment  | MiSeq       | -                     | -                                  | -                 | -                                   |
| CLL081_first treatment | MiSeq       | -                     | -                                  | -                 | -                                   |
| CLL081_post treatment  | MiSeq       | -                     | -                                  | -                 | -                                   |



| Sample ID              | Platform    | ATM Mutation               | ATM Mutation<br>(Variant Fraction) | TP53 Mutation | TP53 Mutation<br>(Variant Fraction) |
|------------------------|-------------|----------------------------|------------------------------------|---------------|-------------------------------------|
| CLL082_first treatment | MiSeq       | -                          | -                                  | R273C         | 0.335                               |
| CLL082_post treatment  | MiSeq       | -                          | -                                  | R273C         | 0.938                               |
| CLL083_first treatment | MiSeq       | -                          | -                                  | -             | -                                   |
| CLL083_post treatment  | MiSeq       | -                          | -                                  | -             | -                                   |
| CLL084_first treatment | WES         | -                          | -                                  | -             | -                                   |
| CLL084_post treatment  | MiSeq & WES | -                          | -                                  | -             | -                                   |
| CLL085_first treatment | MiSeq       | -                          | -                                  | -             | -                                   |
| CLL085_post treatment  | MiSeq       | -                          | -                                  | -             | -                                   |
| CLL086_first treatment | WES         | -                          | -                                  | -             | -                                   |
| CLL086_post treatment  | MiSeq       | -                          | -                                  | -             | -                                   |
| CLL087_first treatment | WES         | -                          | -                                  | -             | -                                   |
| CLL087_post treatment  | MiSeq & WES | -                          | -                                  | -             | -                                   |
| CLL088_first treatment | MiSeq       | -                          | -                                  | -             | -                                   |
| CLL088_post treatment  | MiSeq       | -                          | -                                  | -             | -                                   |
| CLL089_first treatment | WES         | G1522R                     | 0.071                              | -             | -                                   |
| CLL089_post treatment  | MiSeq & WES | G1522R                     | 0.498                              | -             | -                                   |
| CLL090_first treatment | MiSeq       | T2438R                     | 0.118                              | -             | -                                   |
| CLL090_post treatment  | MiSeq       | T2438R                     | 0.152                              | -             | -                                   |
| CLL091_first treatment | MiSeq       | -                          | -                                  | -             | -                                   |
| CLL091_post treatment  | MiSeq & WES | -                          | -                                  | -             | -                                   |
| CLL092_first treatment | MiSeq       | -                          | -                                  | -             | -                                   |
| CLL092_post treatment  | MiSeq       | -                          | -                                  | -             | -                                   |
| CLL093_first treatment | WES         | -                          | -                                  | -             | -                                   |
| CLL093_post treatment  | WES         | -                          | -                                  | R273H         | 0.315                               |
| CLL094_first treatment | WES         | -                          | -                                  | -             | -                                   |
| CLL094_post treatment  | WES         | -                          | -                                  | -             | -                                   |
| CLL095_first treatment | WES         | -                          | -                                  | -             | -                                   |
| CLL095_post treatment  | WES         | -                          | -                                  | -             | -                                   |
| CLL096_first treatment | WES         | -                          | -                                  | -             | -                                   |
| CLL096_post treatment  | WES         | W308R // G1267fs // V2731L | 0.148 // 0.522 // 0.239            | -             | -                                   |

| Sample ID              | Platform    | ATM Mutation       | ATM Mutation<br>(Variant Fraction) | TP53 Mutation | TP53 Mutation<br>(Variant Fraction) |
|------------------------|-------------|--------------------|------------------------------------|---------------|-------------------------------------|
| CLL097_first treatment | WES         | -                  | -                                  | -             | -                                   |
| CLL097_post treatment  | WES         | -                  | -                                  | -             | -                                   |
| CLL098_first treatment | WES         | -                  | -                                  | -             | -                                   |
| CLL098_post treatment  | WES         | -                  | -                                  | -             | -                                   |
| CLL099_first treatment | WES         | Y41C, R2598*       | 0.12                               | -             | -                                   |
| CLL099_post treatment  | WES         | D2725N // T2947*   | 0.227 // 0.496                     | -             | -                                   |
| CLL100_first treatment | WES         | -                  | -                                  | -             | -                                   |
| CLL100_post treatment  | MiSeq & WES | -                  | -                                  | V157F         | 0.259                               |
| CLL101_first treatment | WES         | -                  | -                                  | -             | -                                   |
| CLL101_post treatment  | WES         | -                  | -                                  | -             | -                                   |
| CLL102_first treatment | WES         | E1346fs            | 0.91                               | -             | -                                   |
| CLL102_post treatment  | WES         | E1346fs // Q2615fs | 0.611 // 0.367                     | -             | -                                   |
| CLL103_first treatment | WES         | -                  | -                                  | -             | -                                   |
| CLL103_post treatment  | WES         | -                  | -                                  | R273H         | 0.369                               |

### Significant Regions of Deletion at Treatment-Initiation

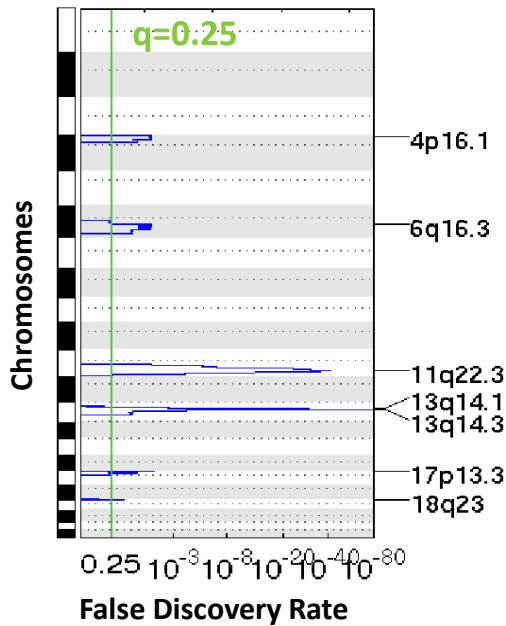

### Significant Regions of Deletion at Relapse

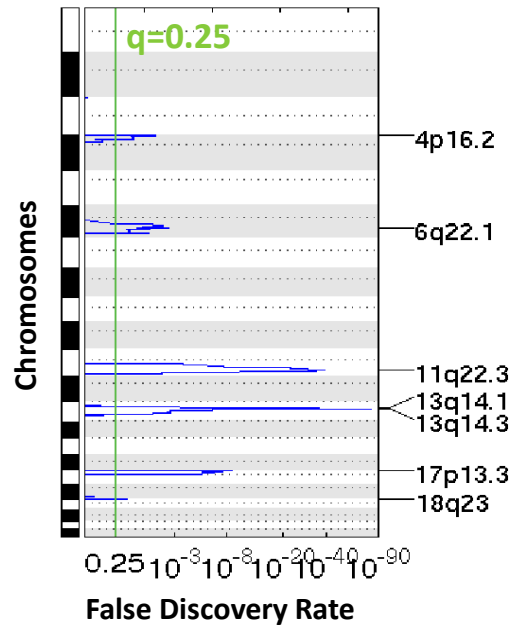

### Significant Regions of Amplification at Treatment-Initiation

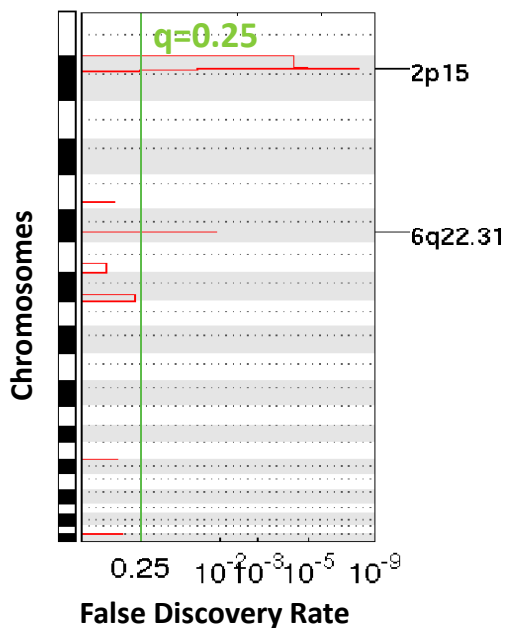

### Significant Regions of Amplification at Relapse

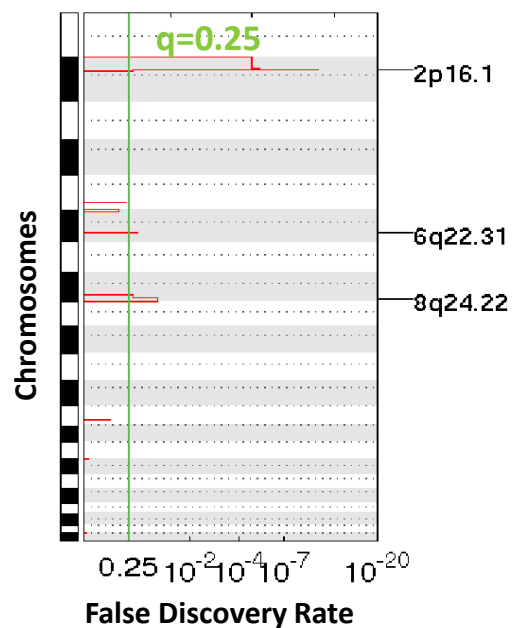

#### Supplementary Figure S1:

Analysis of copy number losses (top) and gains (bottom) at treatment-initiation (left) and relapse (right) by GISTIC.

False Discovery Rate q-values are plotted along the x-axis. Chromosomal positions are plotted along the y-axis. Altered regions with significance levels exceeding 0.25 (marked by vertical green line) were deemed to be significant. Comparing results at treatment-initiation with the corresponding ones at relapse showed an increase in significance for 17p loss and new significance for 8q gain with inclusion of the *c-MYC* locus at 75% confidence.

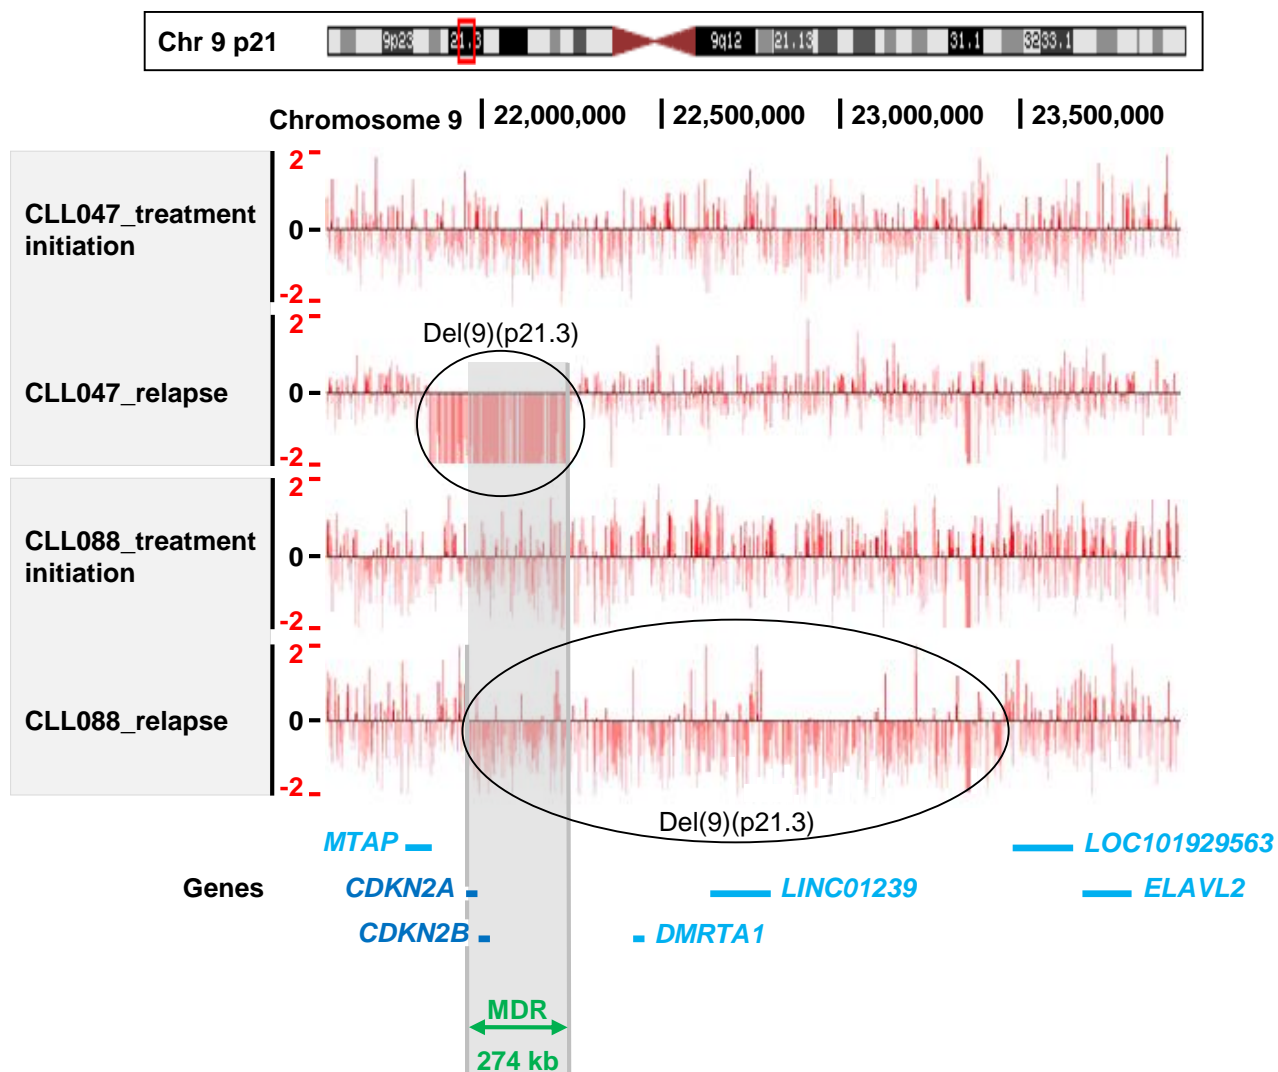

### Supplementary Figure S2:

Shown is the minimally deleted region (MDR) in 9p21.3 defined by two relapse samples (#CLL047\_relapse, #CLL088\_relapse) with a size of 273.716 kb containing only *CDKN2A* and *CDKN2B*. At time of treatment-initiation both deletions in 9p21.3 were not detectable.

Displayed is the raw log<sub>2</sub>-ratio, chromosome 9, blotted to the UCSC genomw browser (hg18). Each red bar represents the determined log<sub>2</sub>-ratio of a single probe set sorted by their physical position along the chromosome.

**A: Survival related to CNA evolution in FC treated patients**

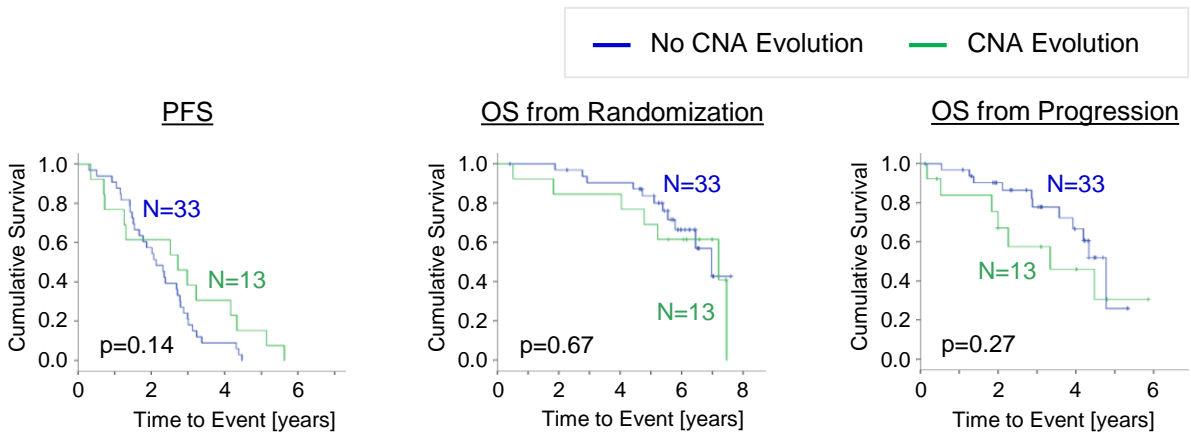

**B: Survival related to CNA evolution in FCR treated patients**

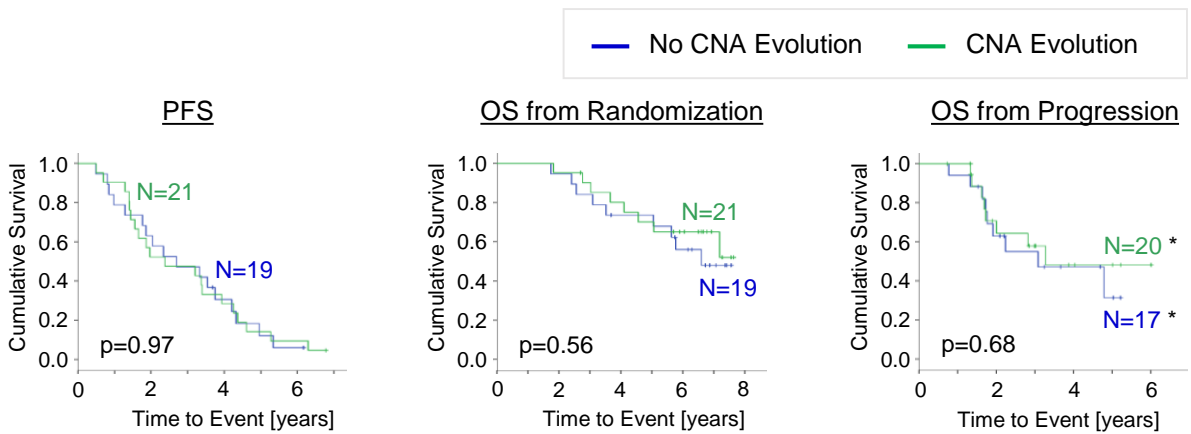

\* 3 patients of the target analysis population do not have documented progressive disease.

**Supplementary Figure S3:**

Kaplan-Meier estimates for patients treated with FC (A) and for patients treated with FCR (B); progression free survival (PFS) and overall survival (OS); according to the presence of CNA evolution. P-values are based on log-rank tests.
